# Supplementary material for: Structure of the DOCK2−ELMO1 complex provides insights into regulation of the auto-inhibited state
Source: PubMed Central journal article supplement (PMC7351999; doi:10.1038/s41467-020-17271-9), 2020-07-10
Supplement: 41467_2020_17271_MOESM1_ESM.pdf [file 41467_2020_17271_MOESM1_ESM.pdf]

**Structure of the DOCK2–ELMO1 complex provides insights into the regulation of the auto-inhibited state**

Chang et al.

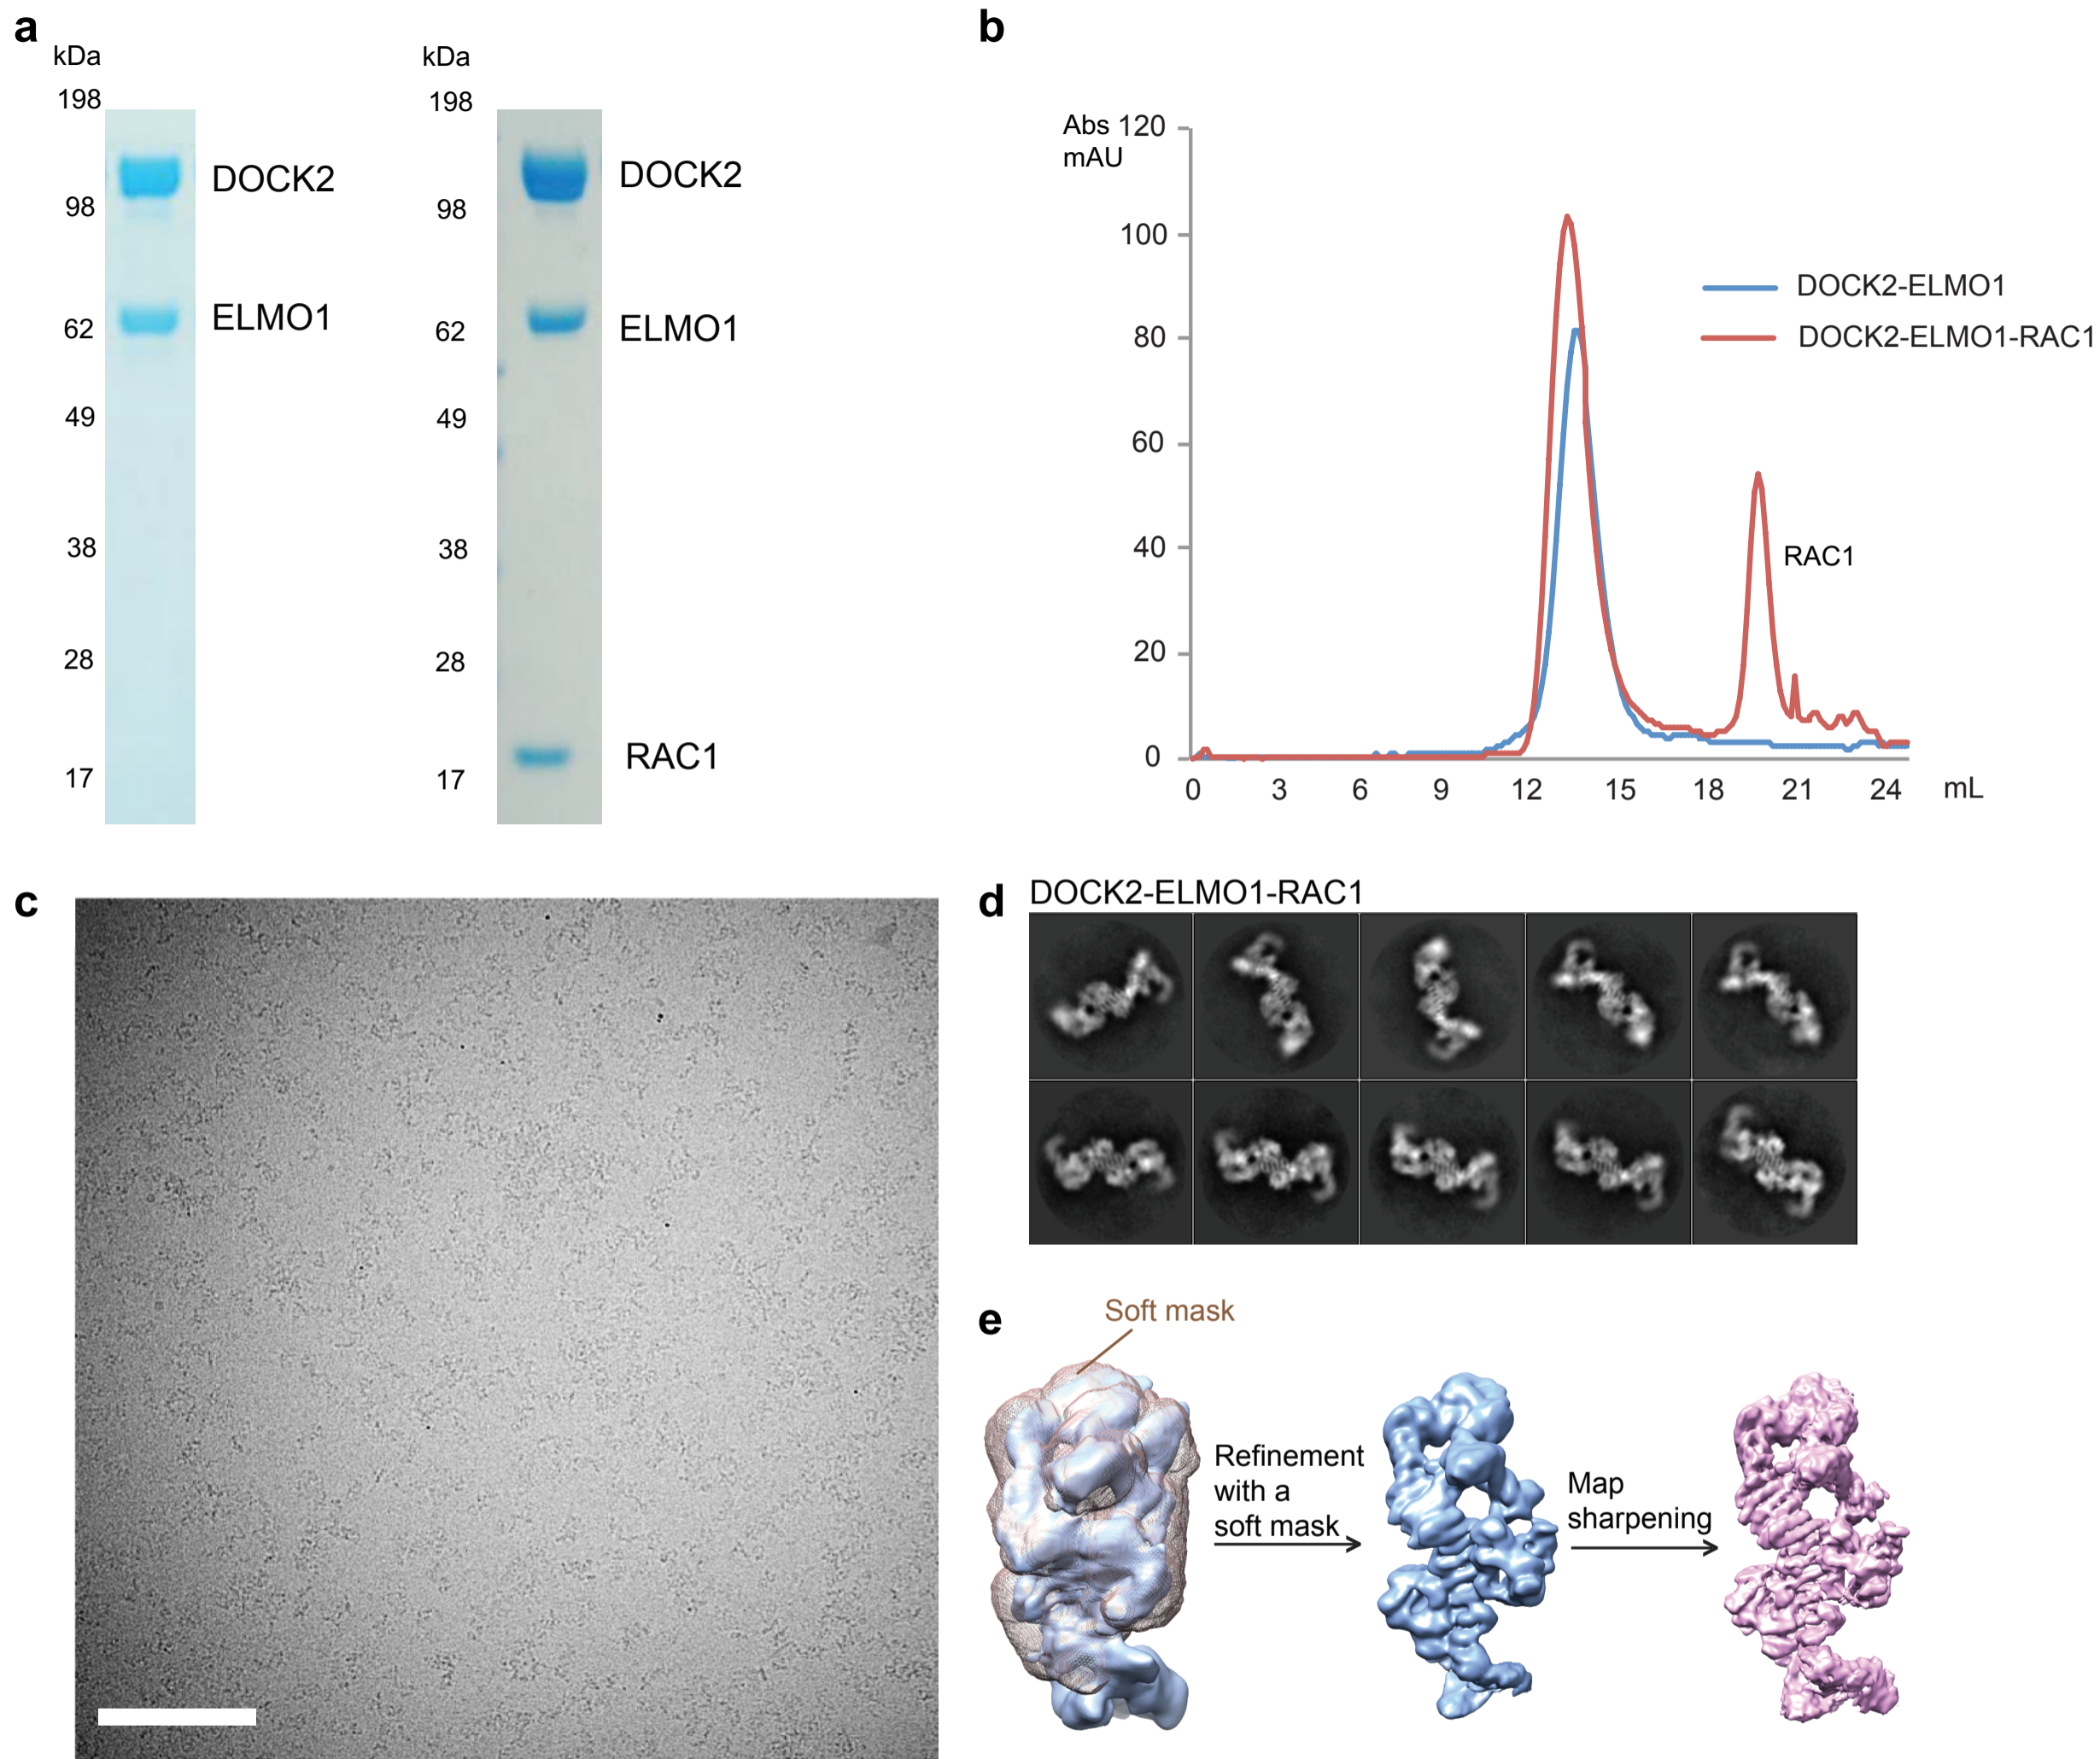

**Supplementary Figure 1 | Sample preparation and cryo-EM of DOCK2-ELMO1 complexes.** **a** Coomassie blue stained SDS-PAGE of the human DOCK2-ELMO1 (**left**) and DOCK2-ELMO1-RAC1 (**right**) complexes. The samples were not cross-linked. **b** Purification of DOCK2-ELMO1 (blue) and DOCK2-ELMO1-RAC1 (red) complexes by size-exclusion chromatography using Superose 6 Increase 10/300 GL. The experiments in (**a**) and (**b**) were performed independently three times with similar results. **c** A typical cryo-EM micrograph of the DOCK2-ELMO1-RAC1 complex, representative of 1914 micrographs. Scale bar = 100 nm. **d** Galleries of 2D class averages of DOCK2-ELMO1-RAC1, representative of 100 2D classes. **e** 3D refinement focussed on a protomer with a mask generates an improved map, allowing observation of  $\alpha$ -helices. Source data are provided as a Source Data file.

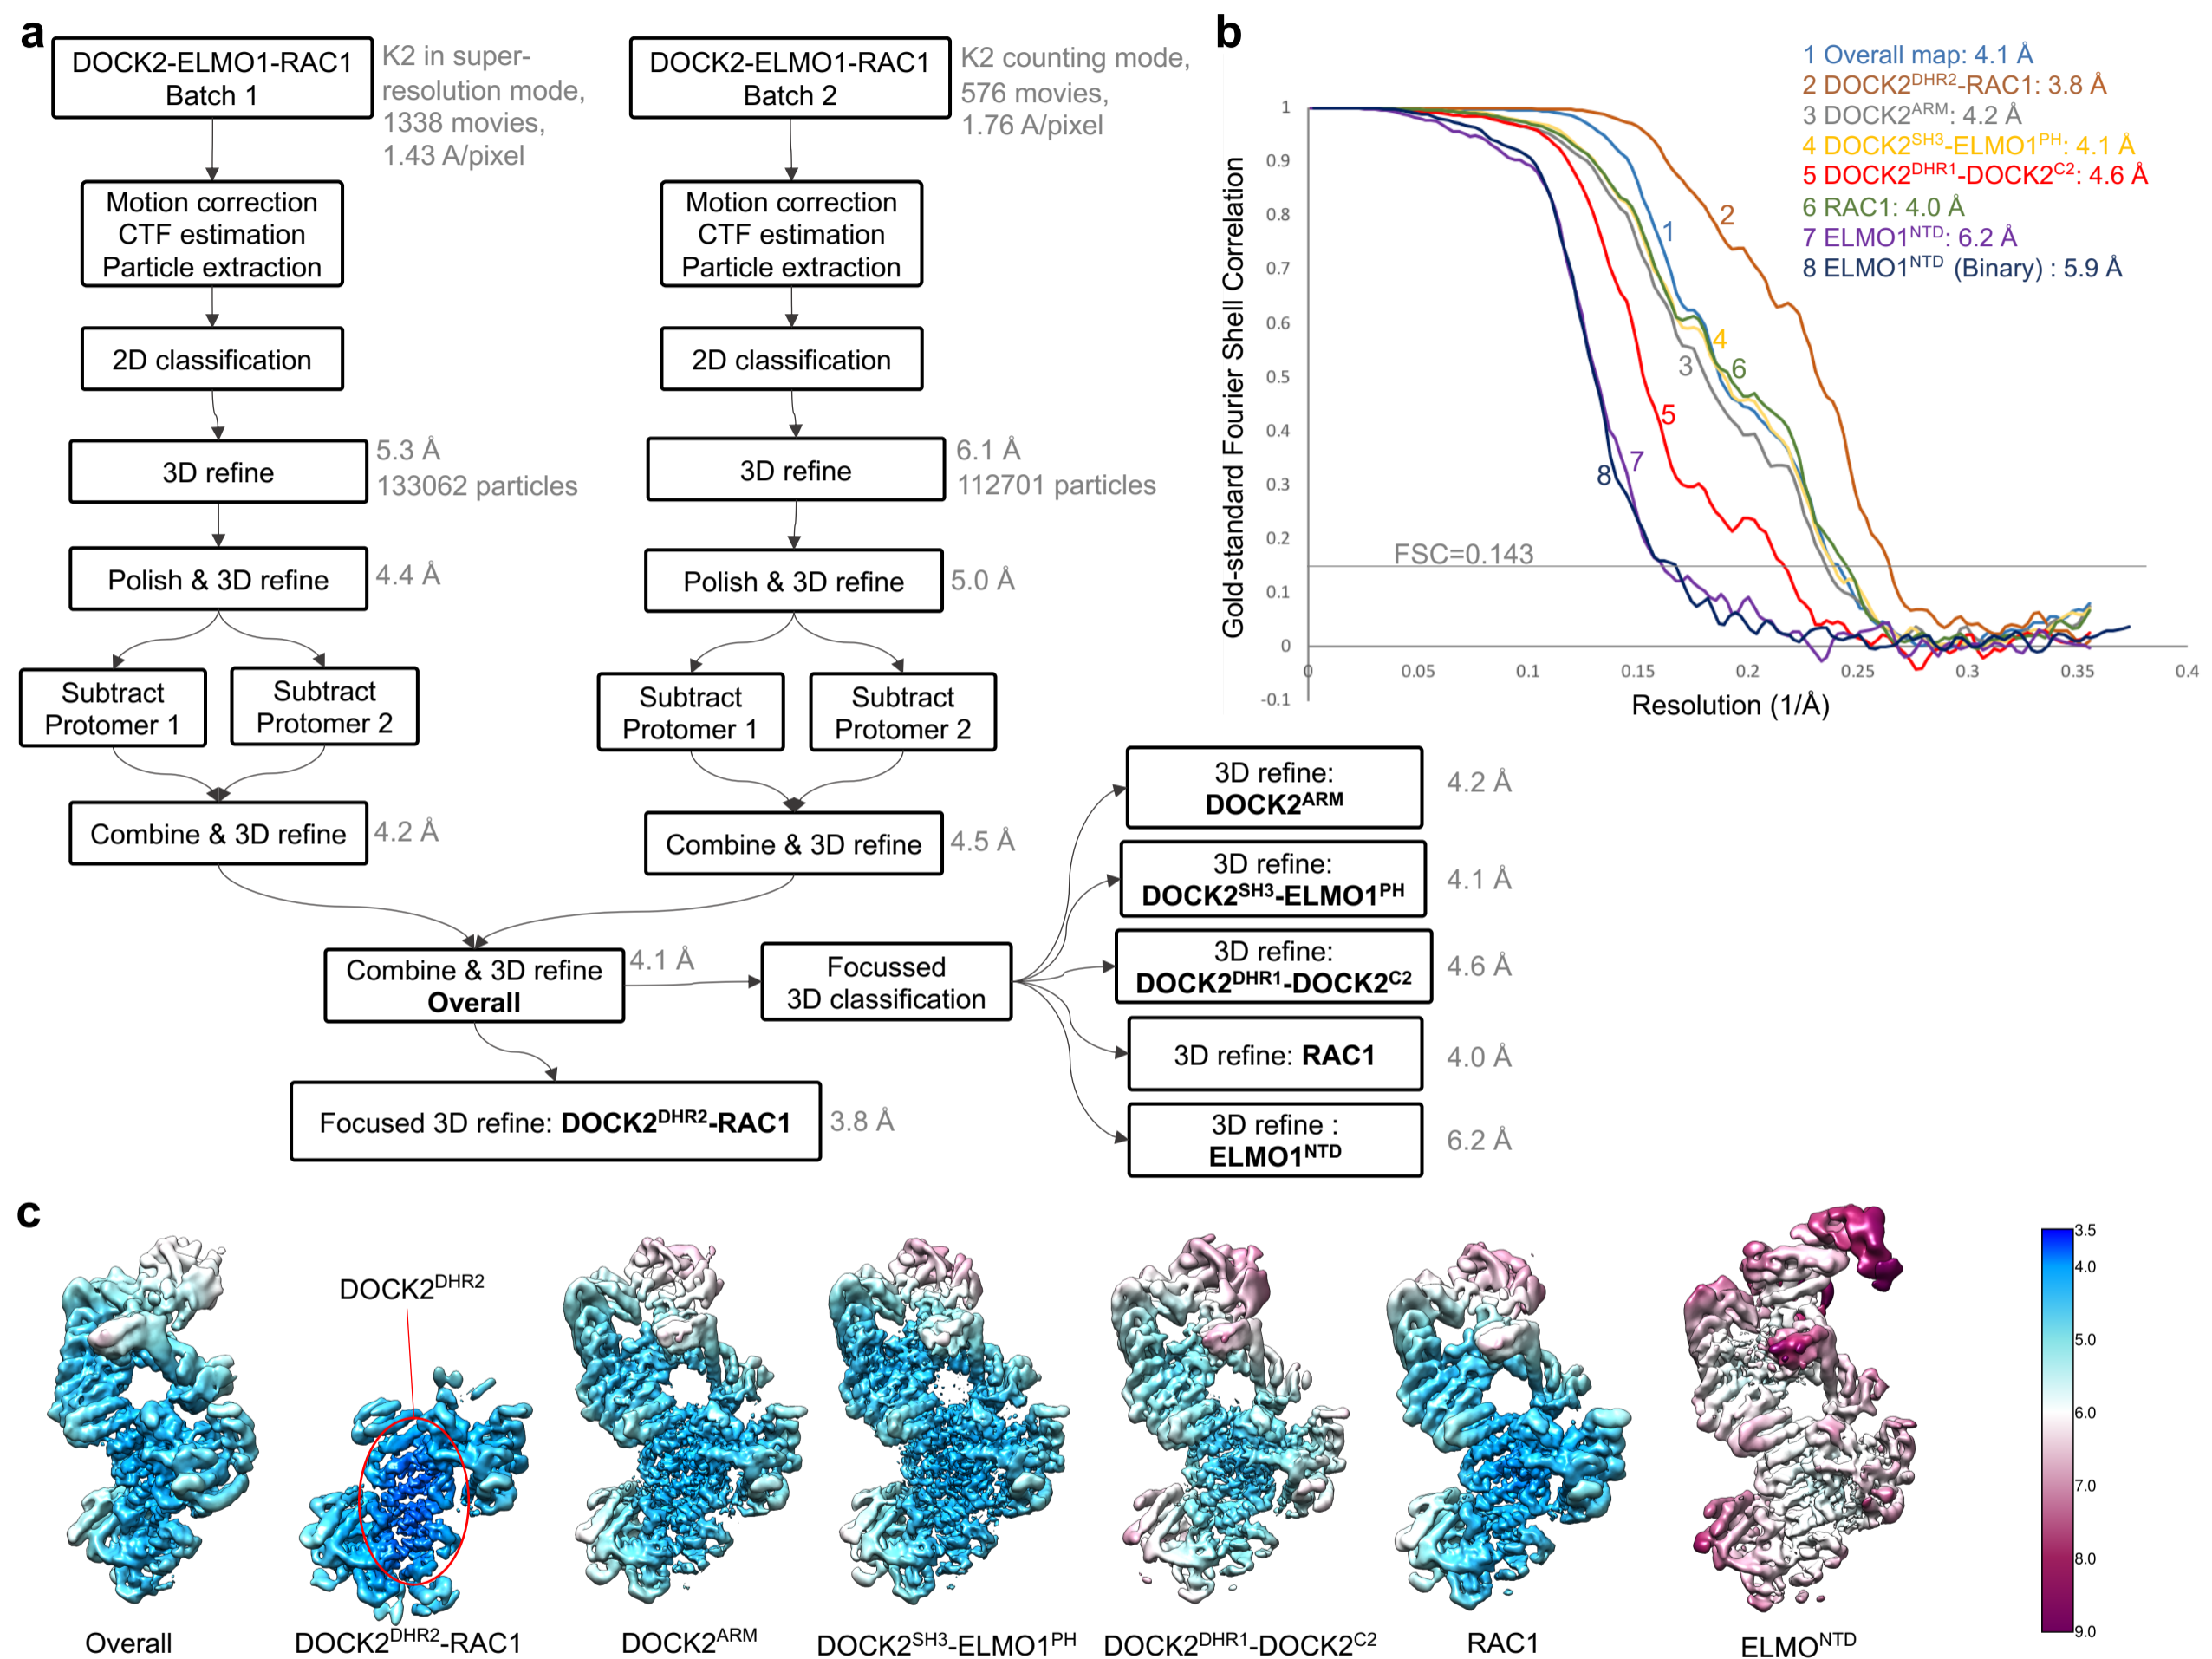

**Supplementary Figure 2 | Cryo-EM data analysis.** **a** Data processing flowchart for the DOCK2-ELMO1-RAC1 complex. See Methods for details. **b** Gold-standard FSC curves of cryo-EM maps for DOCK2-ELMO1 and DOCK2-ELMO1-RAC1 complexes. **c** Local resolutions of DOCK2-ELMO1-RAC1 maps were estimated using RELION <sup>1-5</sup>. Images were generated in Chimera <sup>6</sup>.

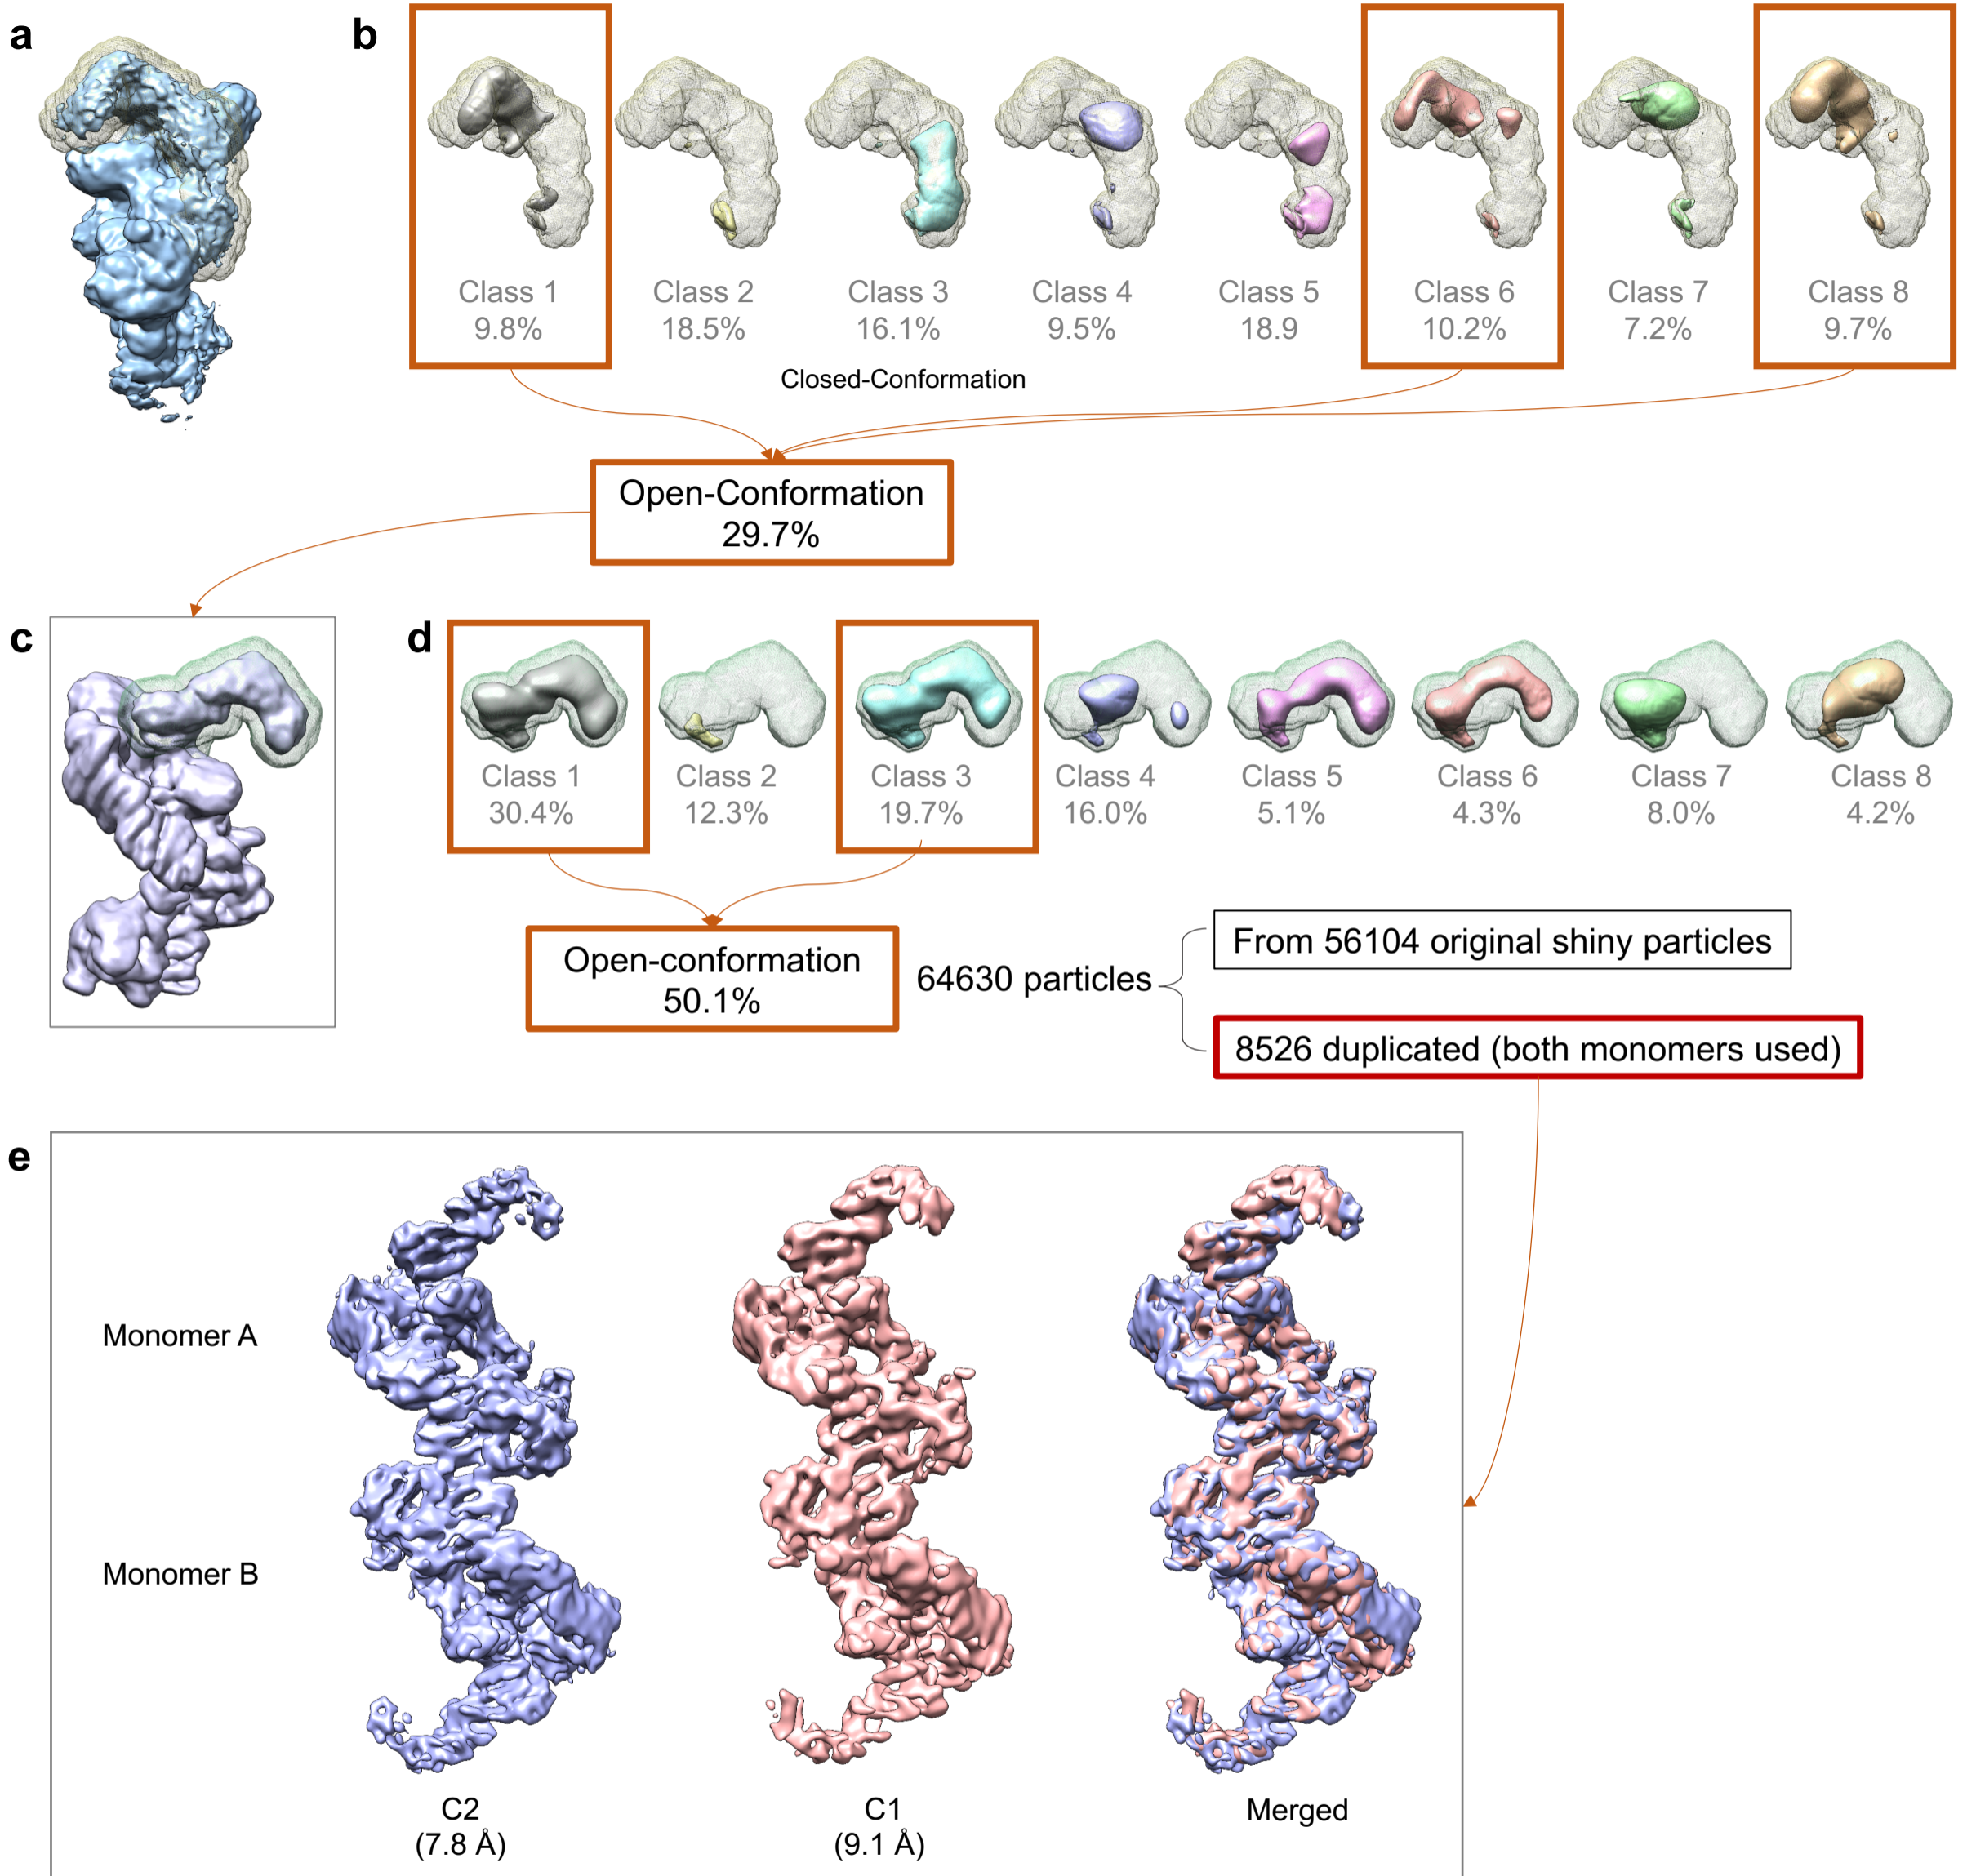

**Supplementary Figure 3 | 3D classification of ELMO1<sup>NTD</sup> in DOCK2-ELMO1-RAC1.** **a** Overall reconstruction of the DOCK2-ELMO1-RAC1 protomer has weak densities for the ELMO1<sup>NTD</sup>. A soft mask for the ELMO1<sup>NTD</sup> is also shown in grey. **b** Focused classification of ELMO1<sup>NTD</sup> in the DOCK2-ELMO1-RAC1 complex, resulting in ~30% of particles in the open-conformation. **c** 3D reconstruction of selected particles with clear density for the ELMO1<sup>NTD</sup>. **d** Second round of focussed classification for ELMO1<sup>NTD</sup>. The first round made use of a bigger mask including ELMO1<sup>NTD</sup> in both open- and closed- conformations, while the second round was focussed only for the open-conformation. **e** Particles with both ordered ELMO1<sup>NTD</sup> domains were selected for a reconstruction of the whole DOCK2-ELMO1-RAC1 without imposed symmetry (C1) or with 2-fold symmetry (C2).

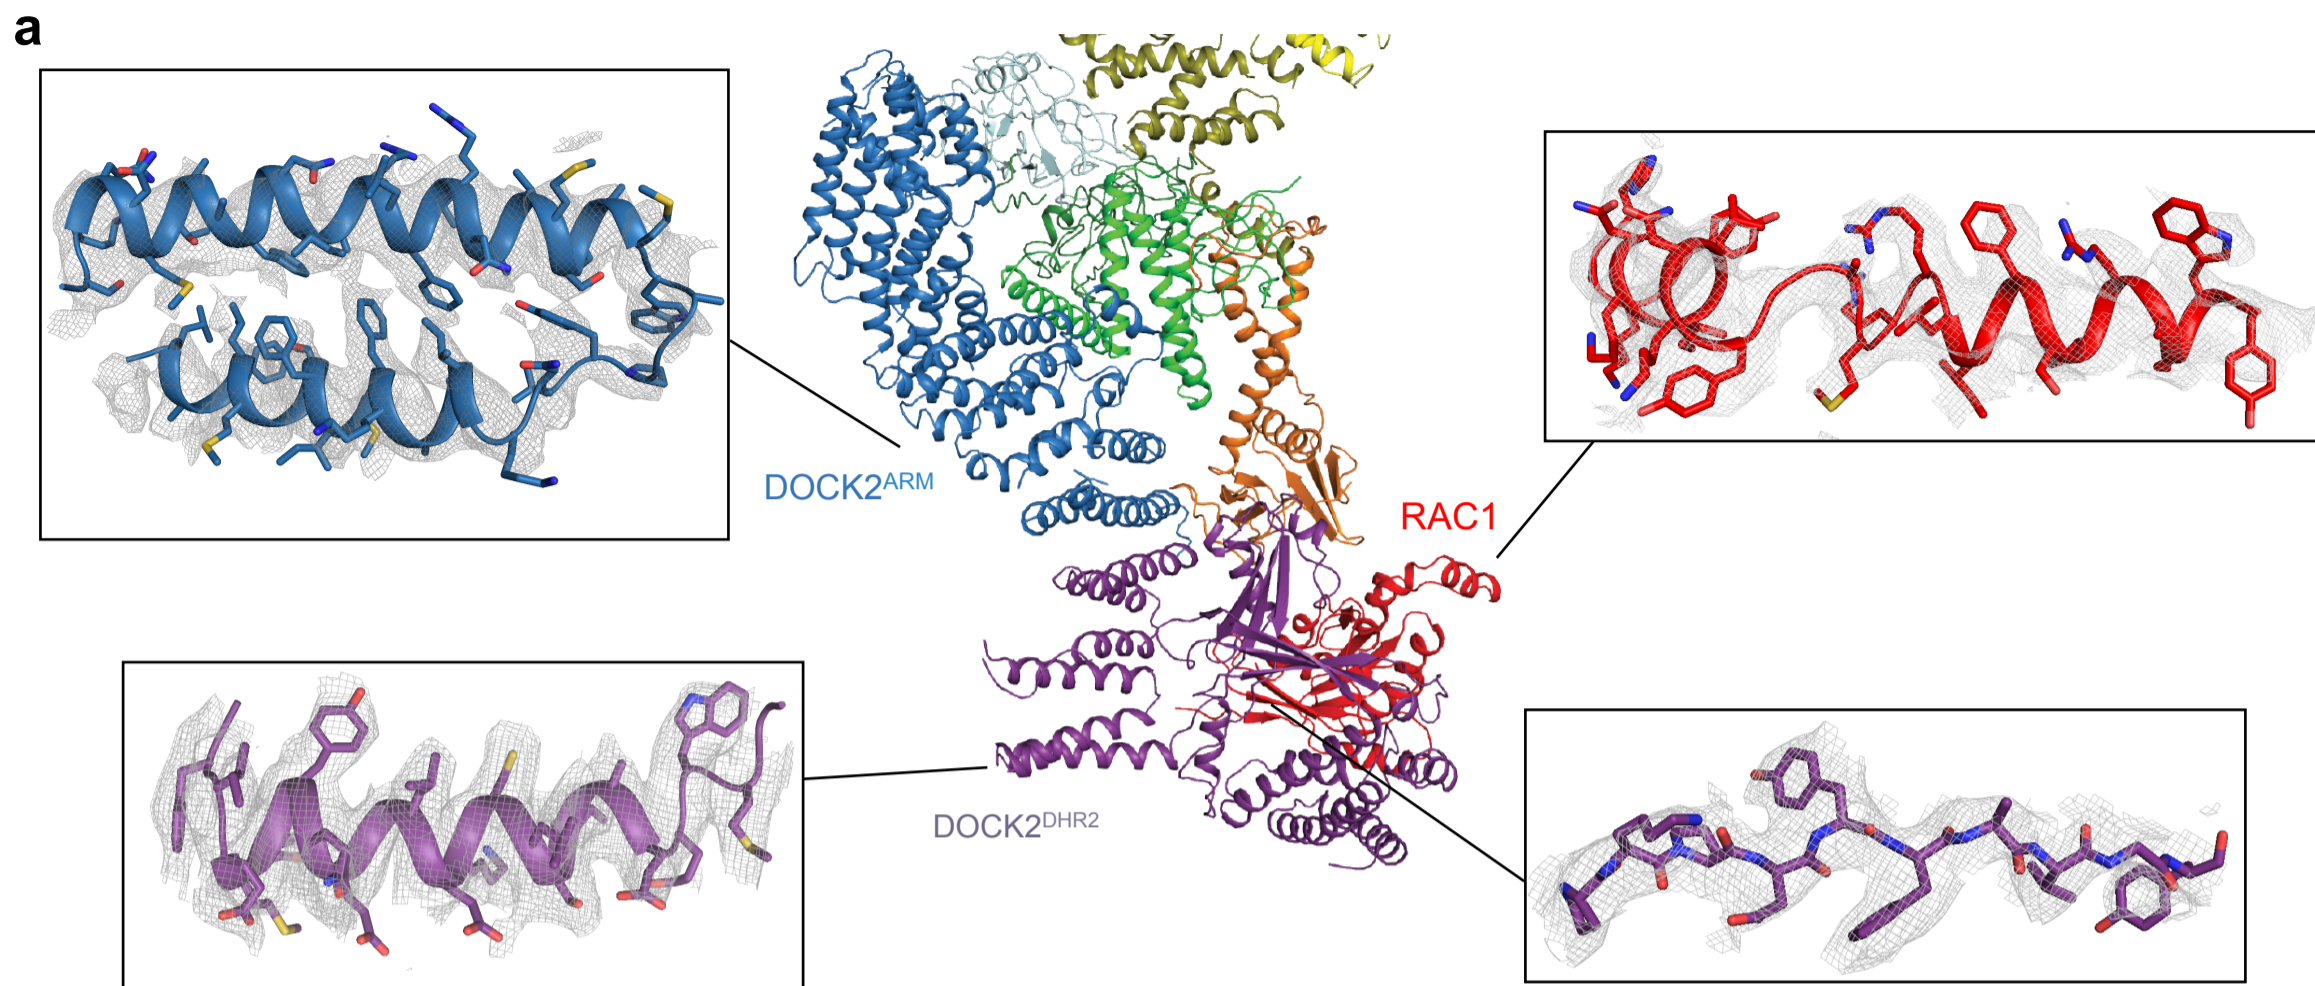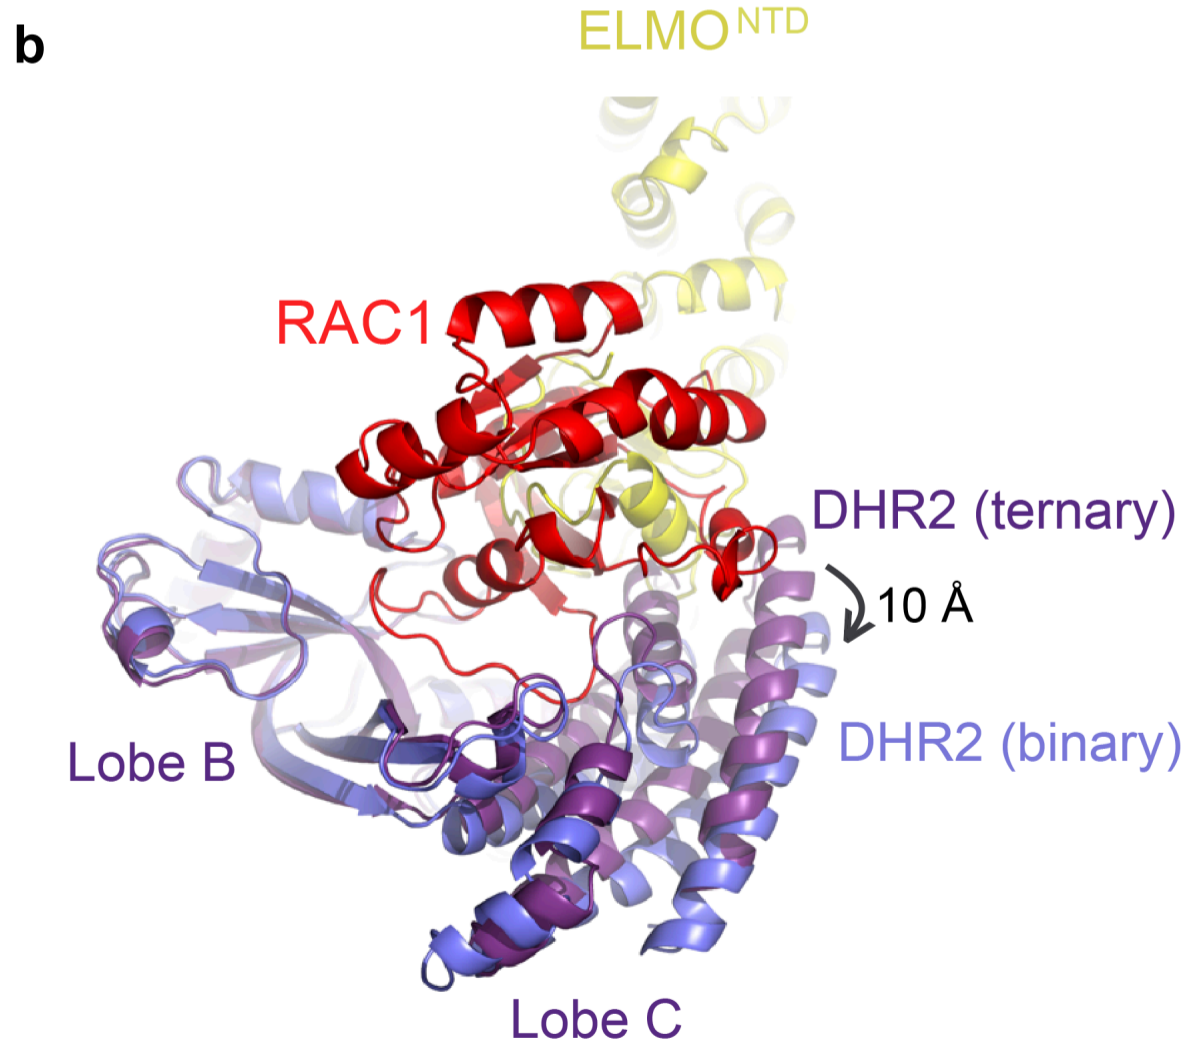

**Supplementary Figure 4 | Typical densities and model building of DOCK2-ELMO1-RAC1 complex.** **a** Representative density maps of the DOCK2<sup>DHR2</sup> domain, RAC1, and DOCK2<sup>ARM</sup> are shown. An  $\alpha$ -helix, a  $\beta$ -strand a loop are presented. **b** Conformational change in lobe C of the DOCK2<sup>DHR2</sup> domain between the binary and ternary complexes.

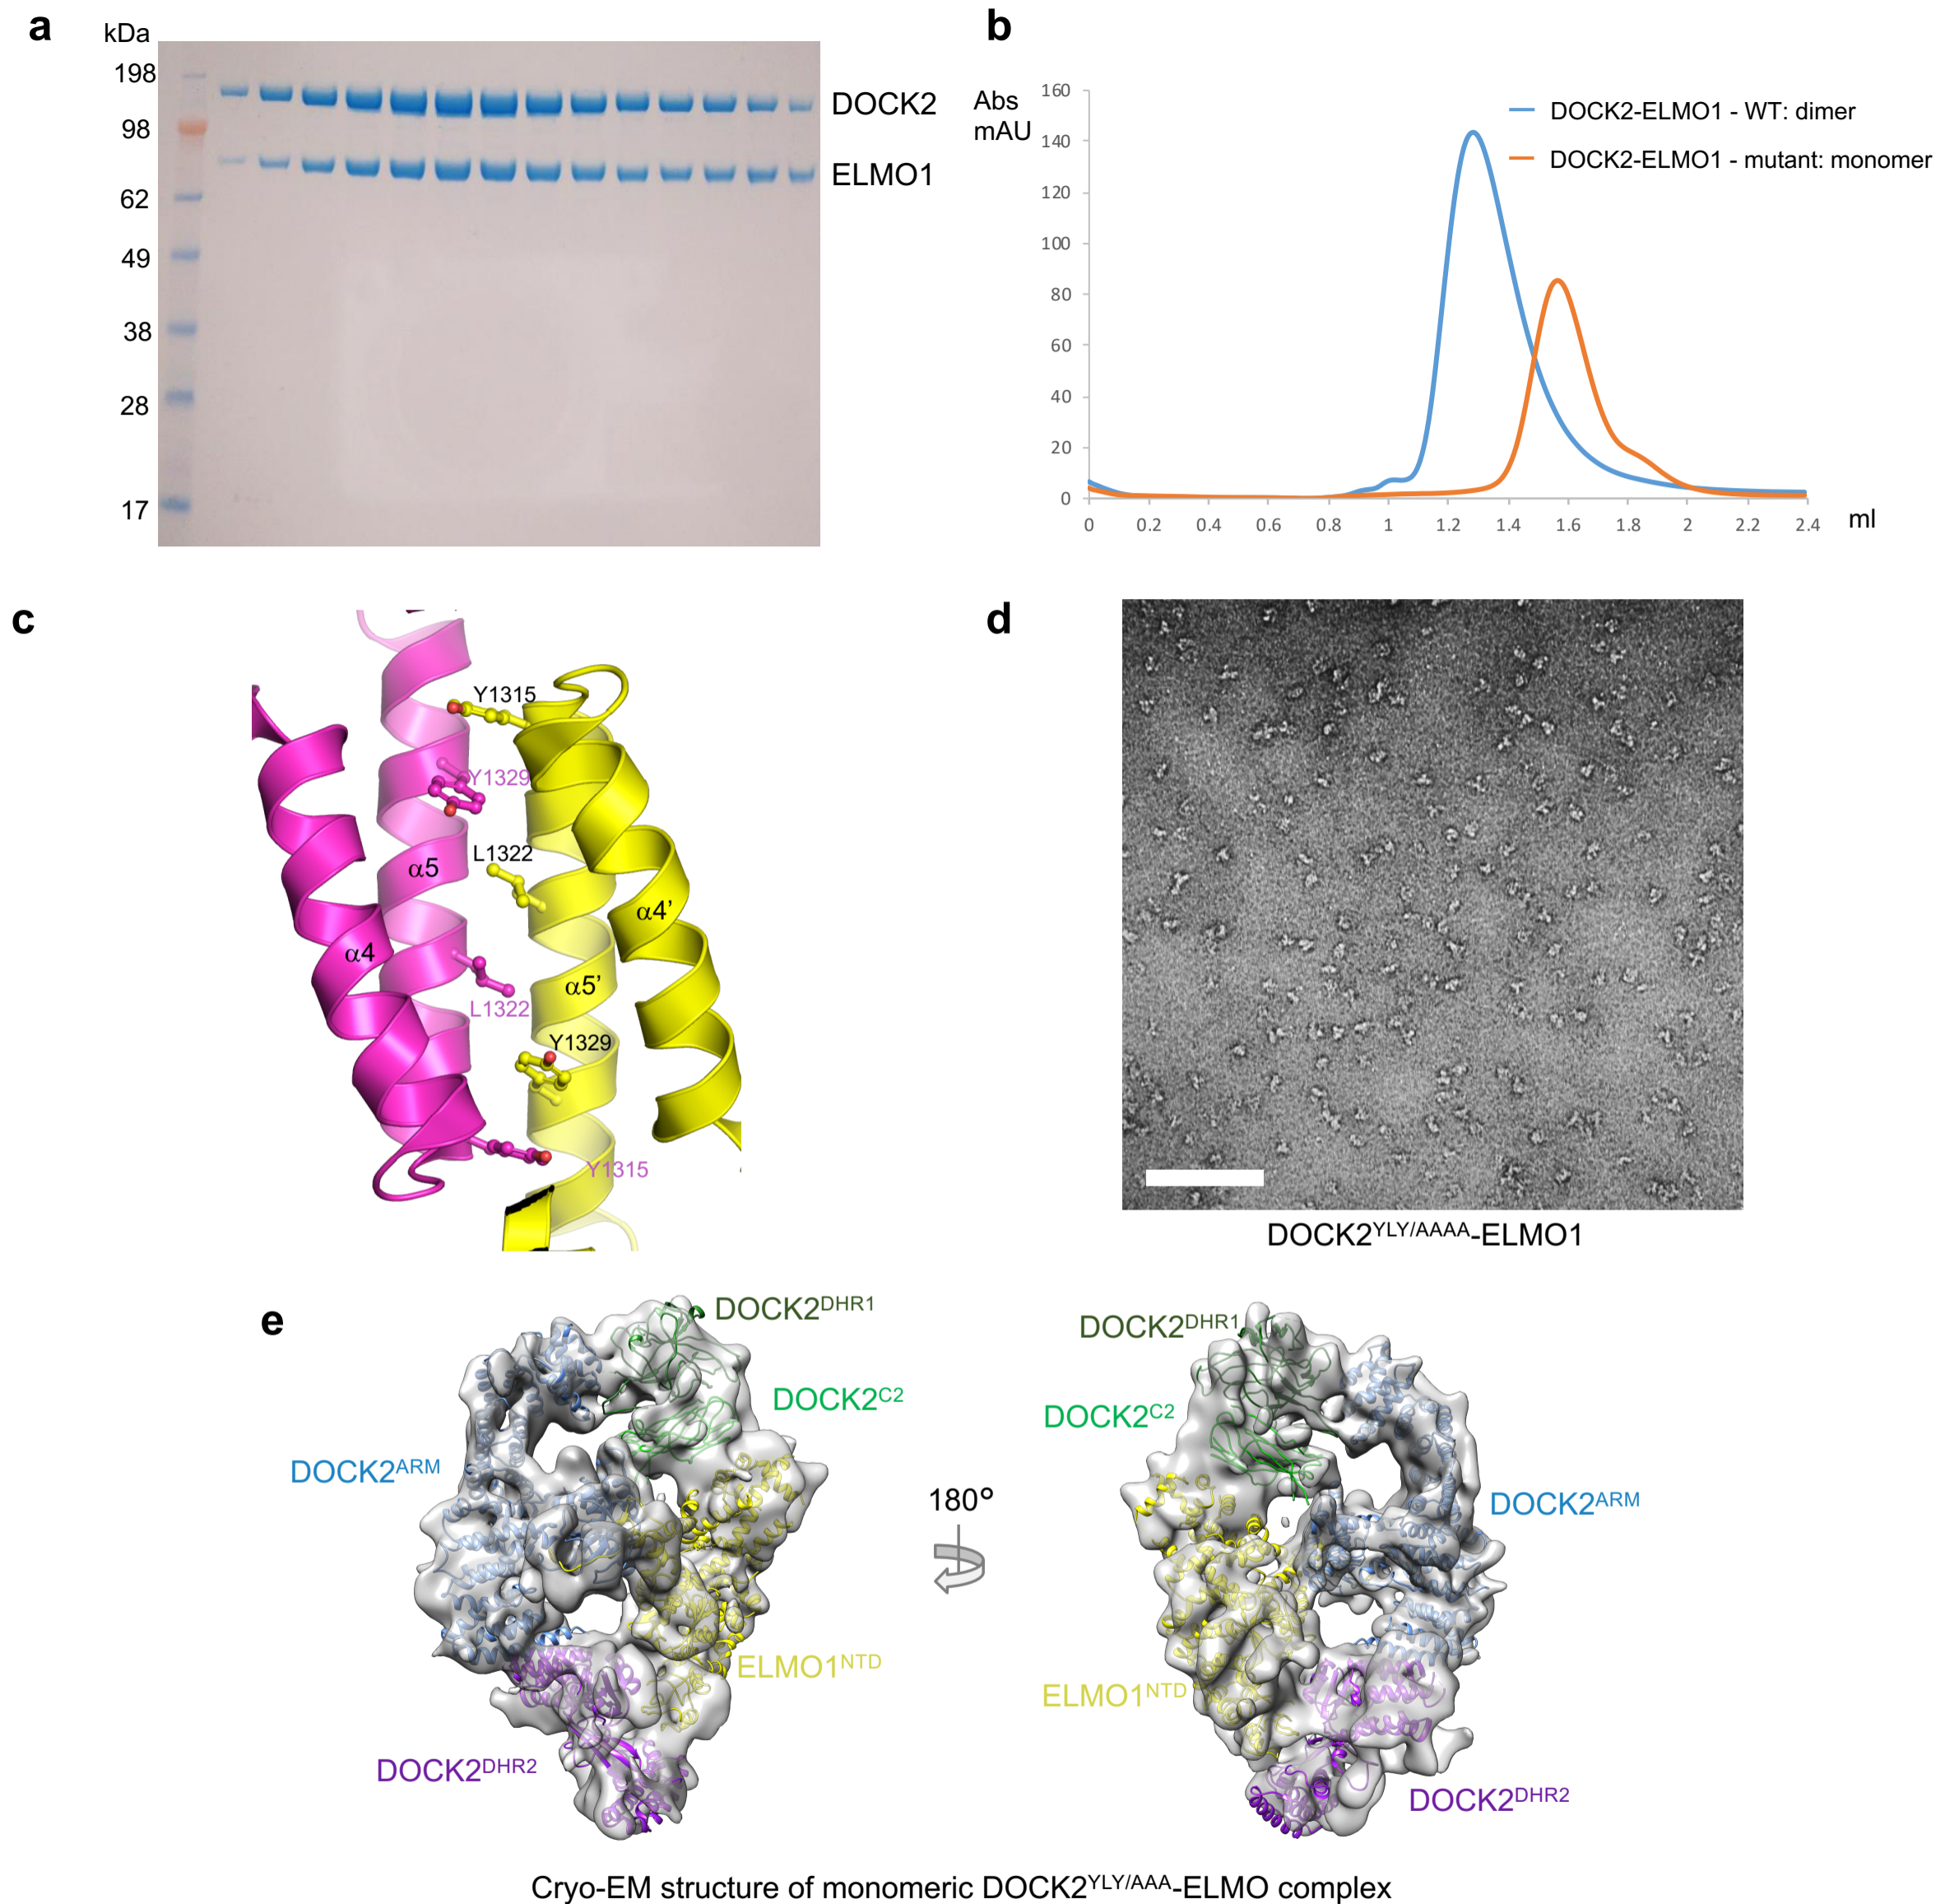

**Supplementary Figure 5 | EM analysis of the monomeric DOCK2<sup>YLY/AAA</sup>-ELMO1 complex.** **a** Coomassie blue stained SDS-PAGE of the DOCK2<sup>YLY/AAA</sup>-ELMO1 complex. The sample was not cross-linked. **b** SEC for the DOCK2-ELMO1 complex (wild type: dimer, light blue) and DOCK2-ELMO1 dimerization mutant (monomer, orange). The experiments in **(a)** and **(b)** were performed independently three times with similar results. **c** View of the DOCK2<sup>DHR2</sup> dimerization interface showing dimer-interface mutants Y1315A/L1322A/Y1329A. Based on PDB 2YIN<sup>46</sup>. **d** A typical negative stain EM image of the DOCK2<sup>YLY/AAA</sup>-ELMO1 complex, representative of 100 micrographs. Particles are smaller than the wild-type complex, indicating that they are not dimerized. Scale bar = 100 nm. **e** Cryo-EM map of the monomeric DOCK2<sup>YLY/AAA</sup>-ELMO1 complex with DOCK2-ELMO1 model fitted. Source data are provided as a Source Data file.

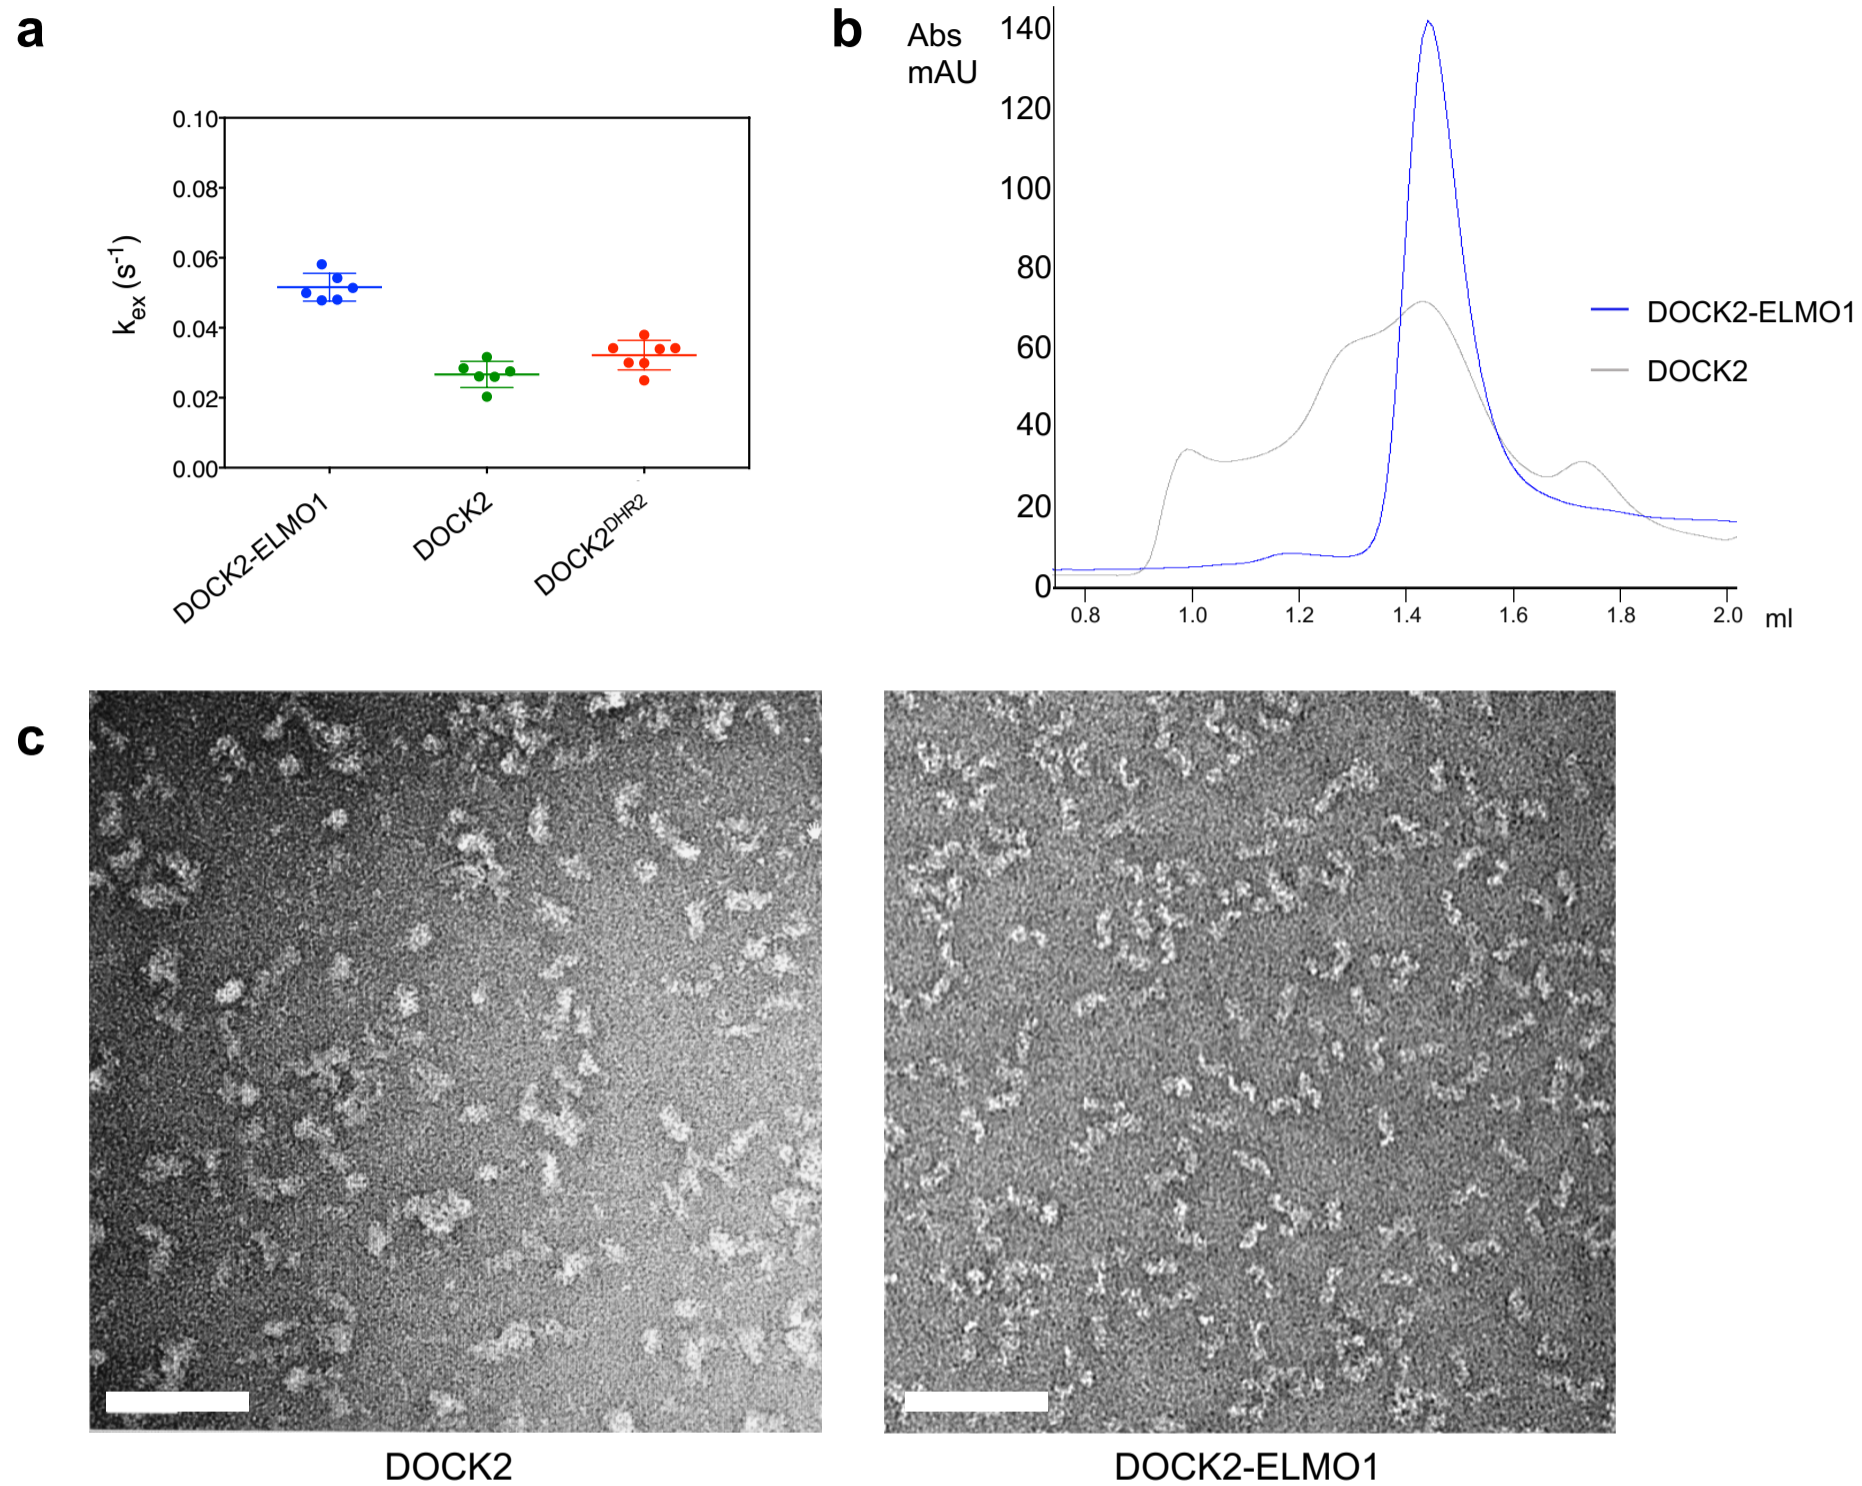

**Supplementary Figure 6 | DOCK2 alone is unstable.** **a** DOCK2 alone (green) showed reduced GEF activity compared to DOCK2<sup>DHR2</sup> (red). In contrast, the DOCK2-ELMO1 complex (blue) has twice the activity of DOCK2 alone. Data are presented as mean values with error bars of +/- one standard deviation. The experiment was performed seven times.  $k_{ex}$  is the rate constant for exchange of mant-GTP for GDP from a fit of the data to a single exponential rate equation to the entire exchange reaction. **b** Purification of DOCK2-ELMO1 (blue line) and DOCK2 alone (grey line) complexes by size-exclusion chromatography using Superose 6 Increase 3.2/300 GL. DOCK2 alone showed extended peaks. The experiment was performed independently three times with similar results. **c** Typical negative stain EM images of DOCK2 alone and the DOCK2-ELMO1 complex, representative of 40 and 205 micrographs, respectively. Particles of DOCK2 sample are heterogeneous in size. Large particles in the image are indicative of small aggregations. Scale bar = 100 nm. Source data are provided as a Source Data file.

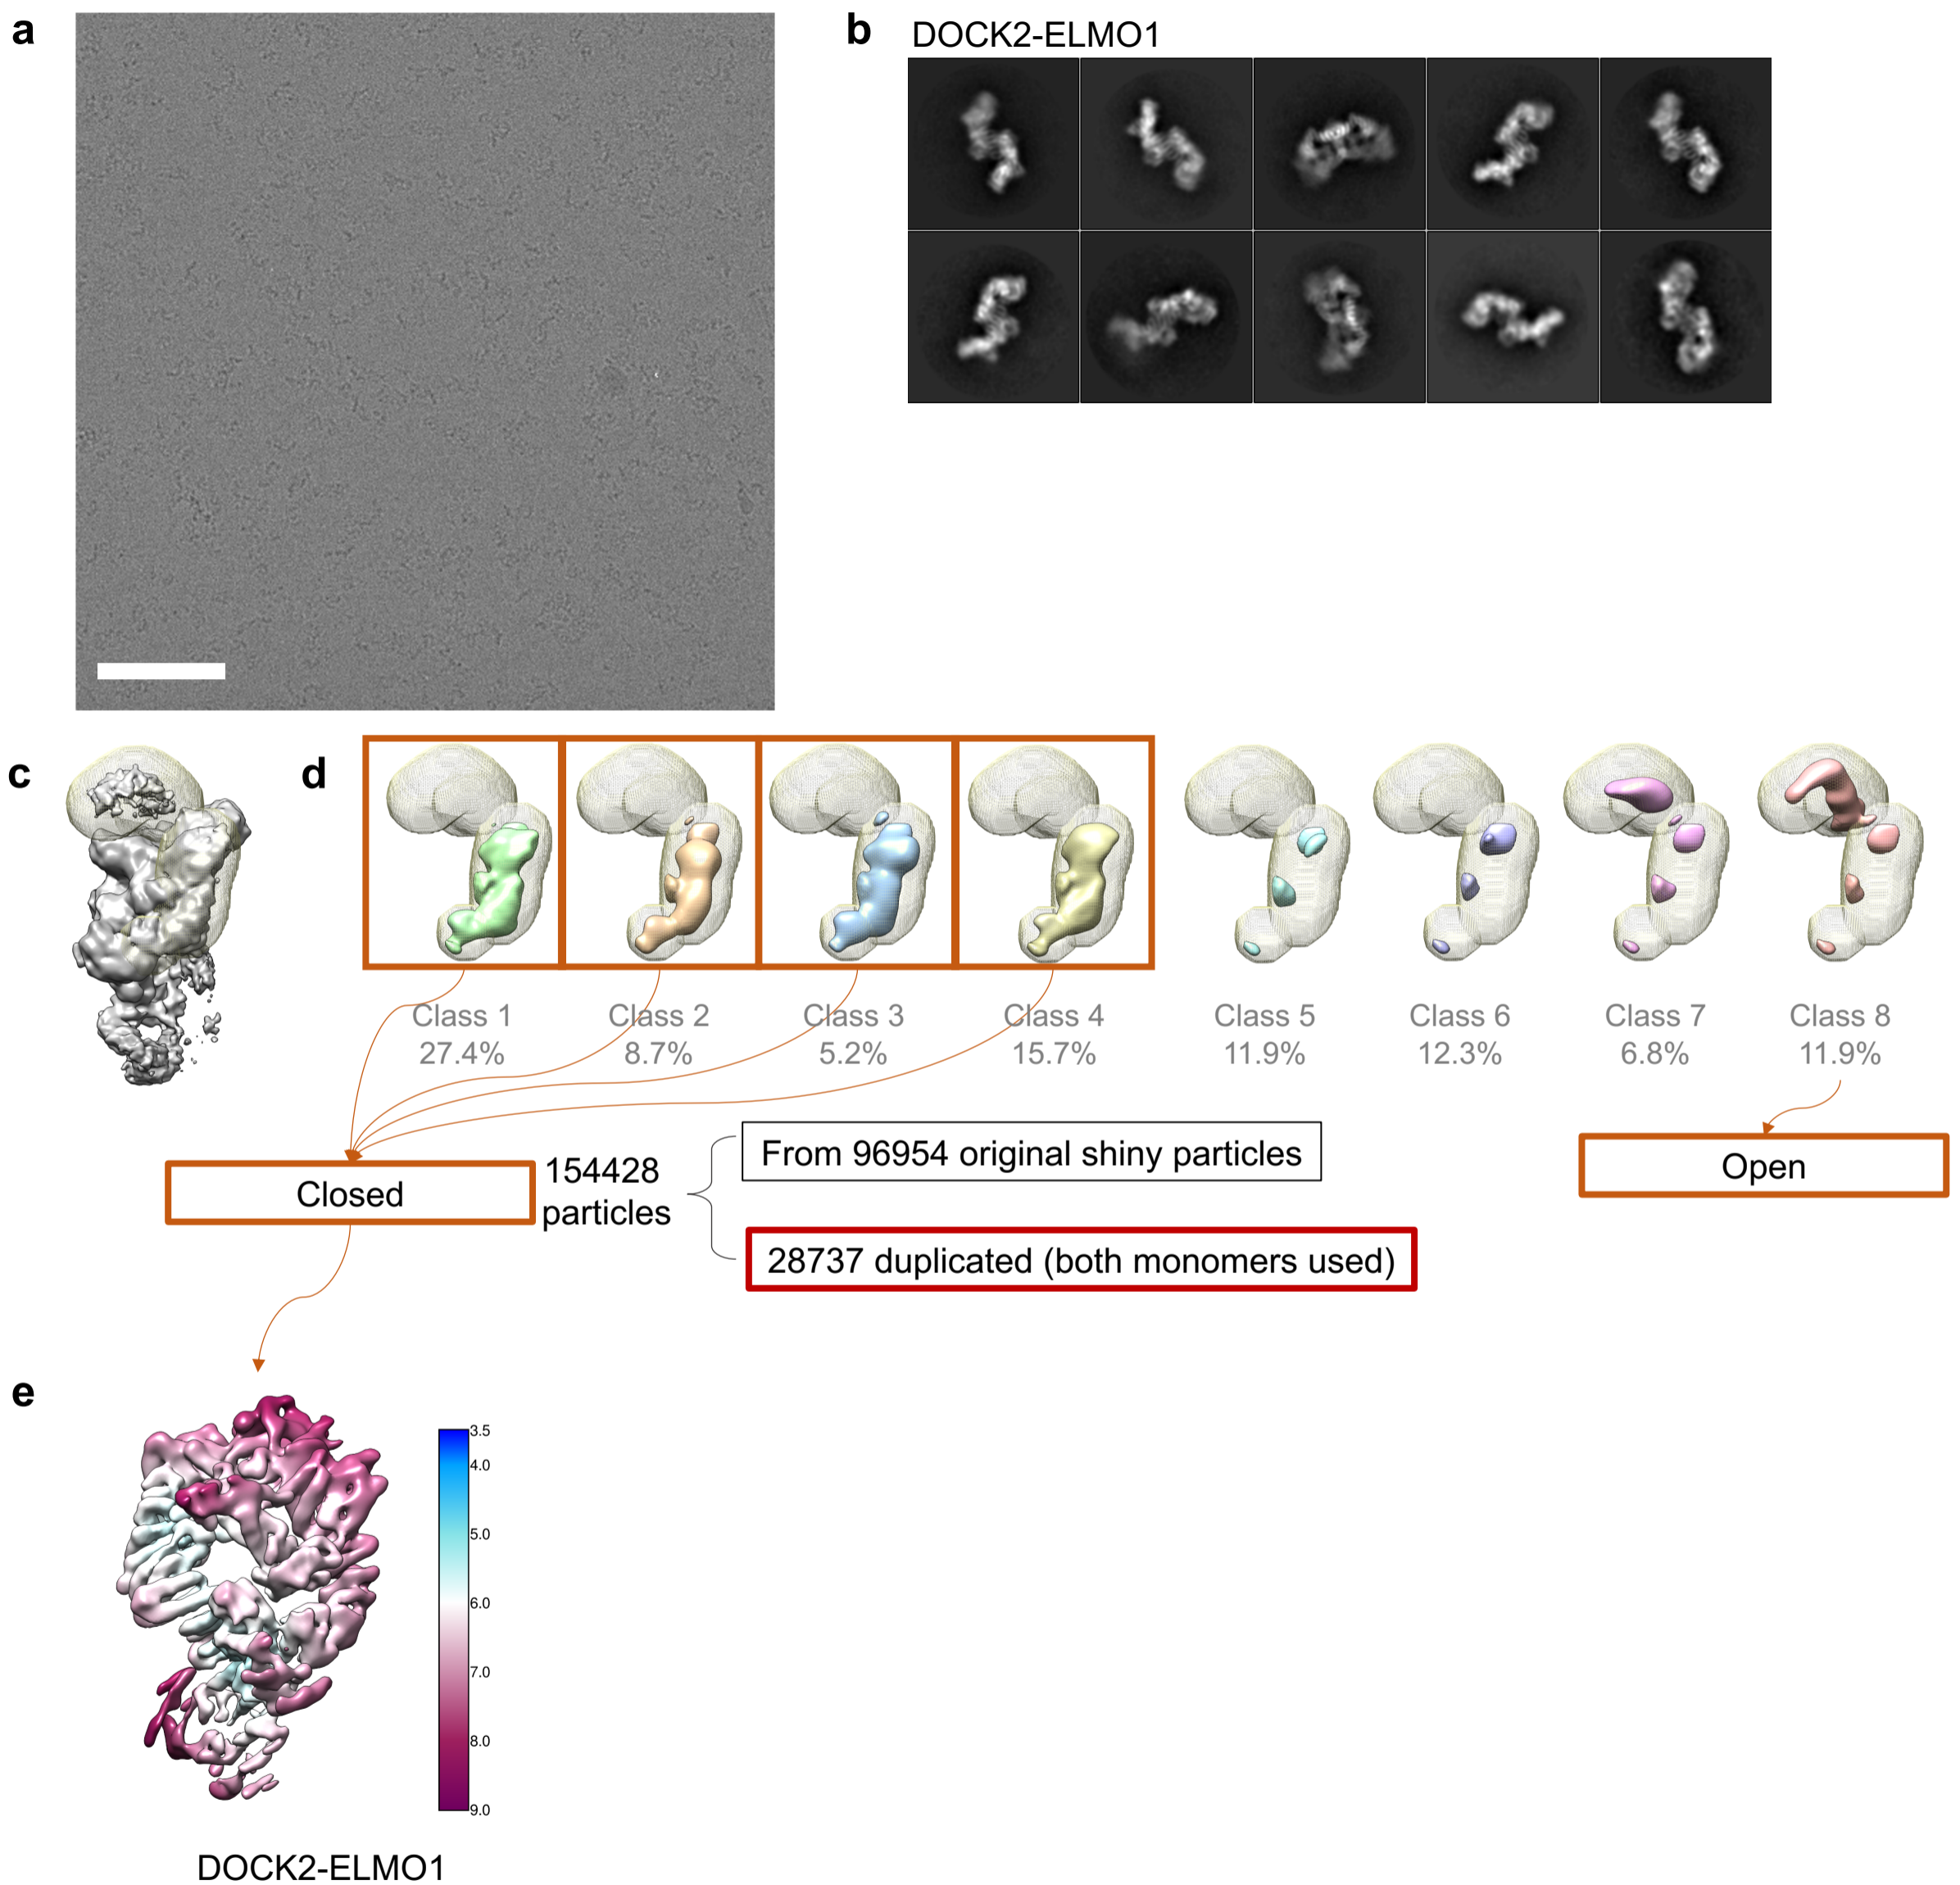

**Supplementary Figure 7 | 3D reconstruction of DOCK2-ELMO1.** **a** A typical cryo-EM micrograph of the DOCK2-ELMO1 complex, representative of 4591 micrographs. Scale bar = 100 nm. **b** Gallery of 2D class averages of DOCK2-ELMO1, representative of 100 2D classes. **c** Overall reconstruction of the DOCK2-ELMO1 protomer has weak densities for the ELMO1<sup>NTD</sup>. A soft mask for the ELMO1<sup>NTD</sup> is also shown. **d** Focused classification of ELMO1<sup>NTD</sup> in the DOCK2-ELMO1 complex, resulting in ~57% of particles in the closed-conformation and in ~12% of particles in the open-conformation. **e** Local resolutions of the DOCK2-ELMO1 map were estimated using RELION<sup>1-5</sup>. Images were generated in Chimera<sup>6</sup>.



a

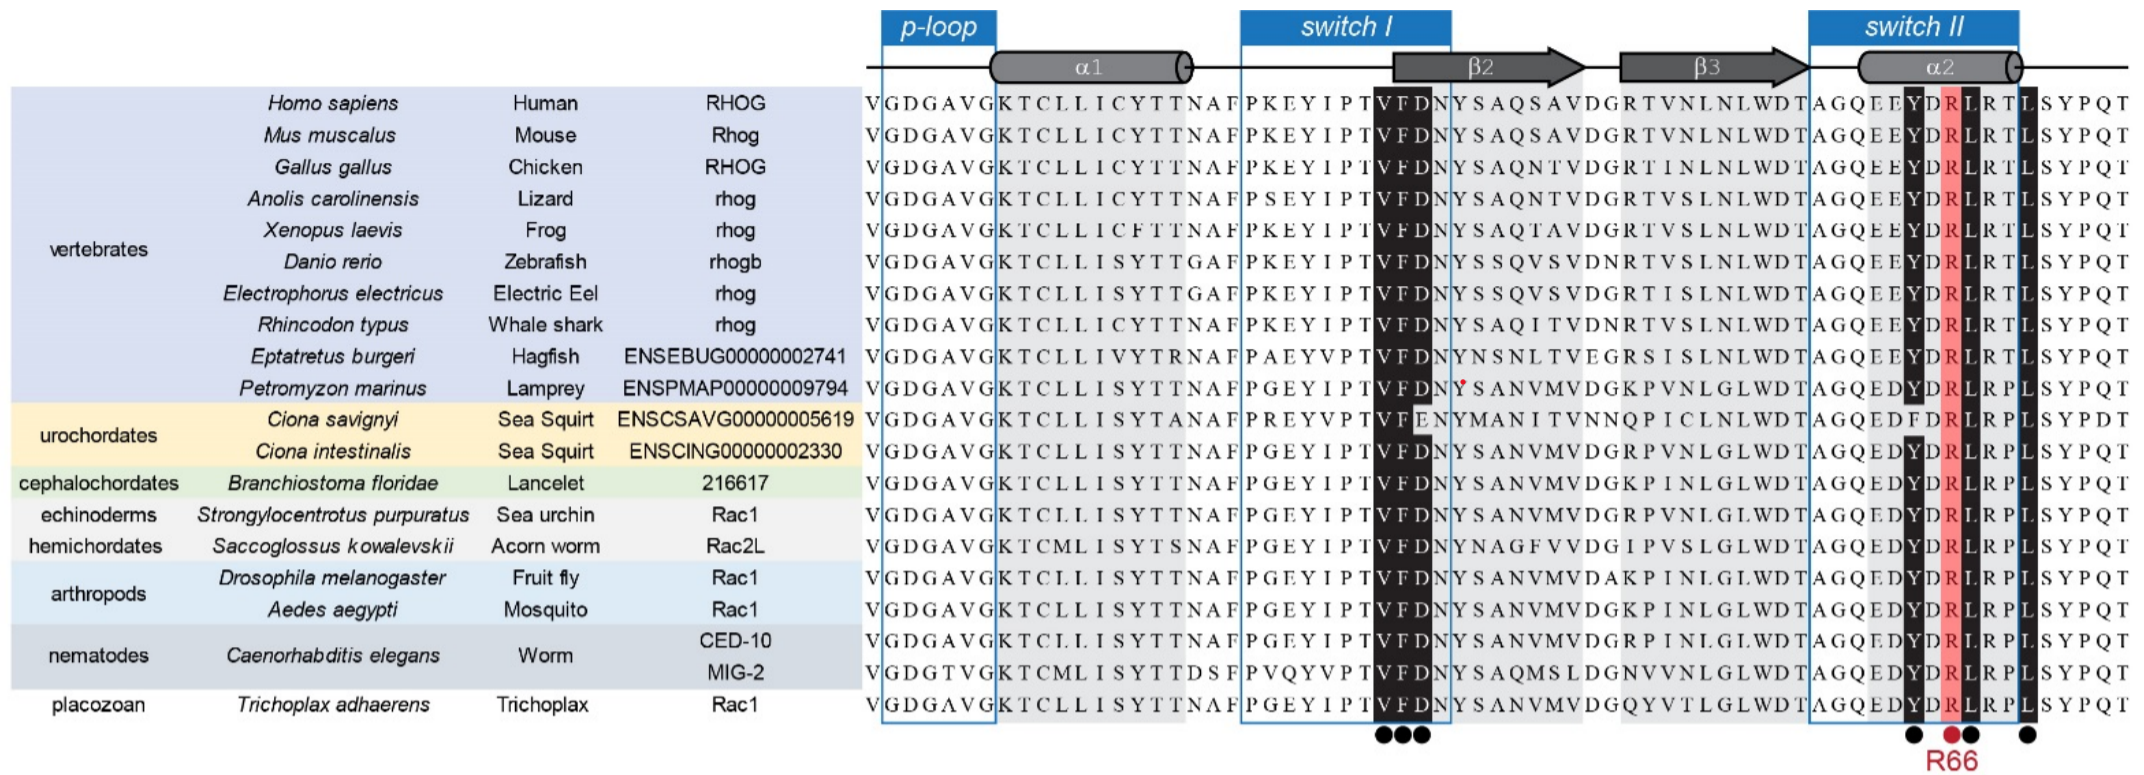

b

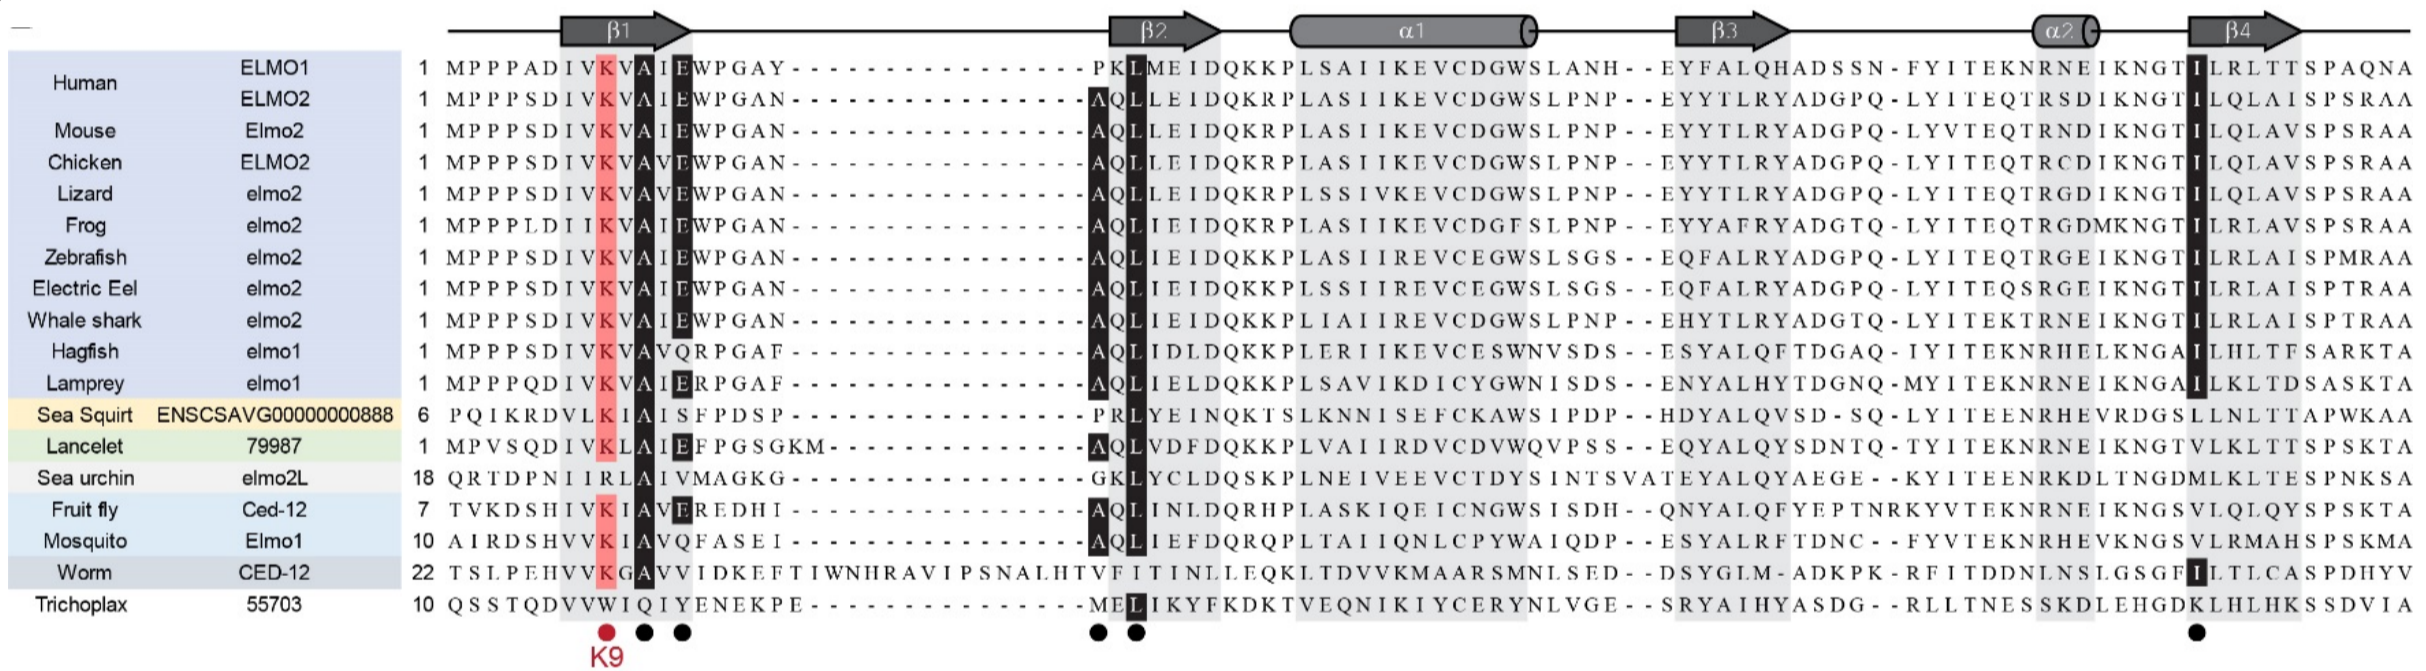

**Supplementary Figure 8 | Sequence alignments demonstrating evolutionary conservation of RHOG and ELMO. RHOG (a) or ELMO2 (b) orthologs are aligned based on amino acid sequence. Location of secondary structures as derived from the RHOG-ELMO2<sup>RBD</sup> structure are indicated at the top. The P-loop, switch 1 and switch 2 regions of RHOG are labelled over the secondary structures and outlined in blue boxes. Key residues at the binding interface are indicated with black points and shading. The important Lys9 residue of ELMO2 and Arg66 residue of RHOG are highlighted red.**

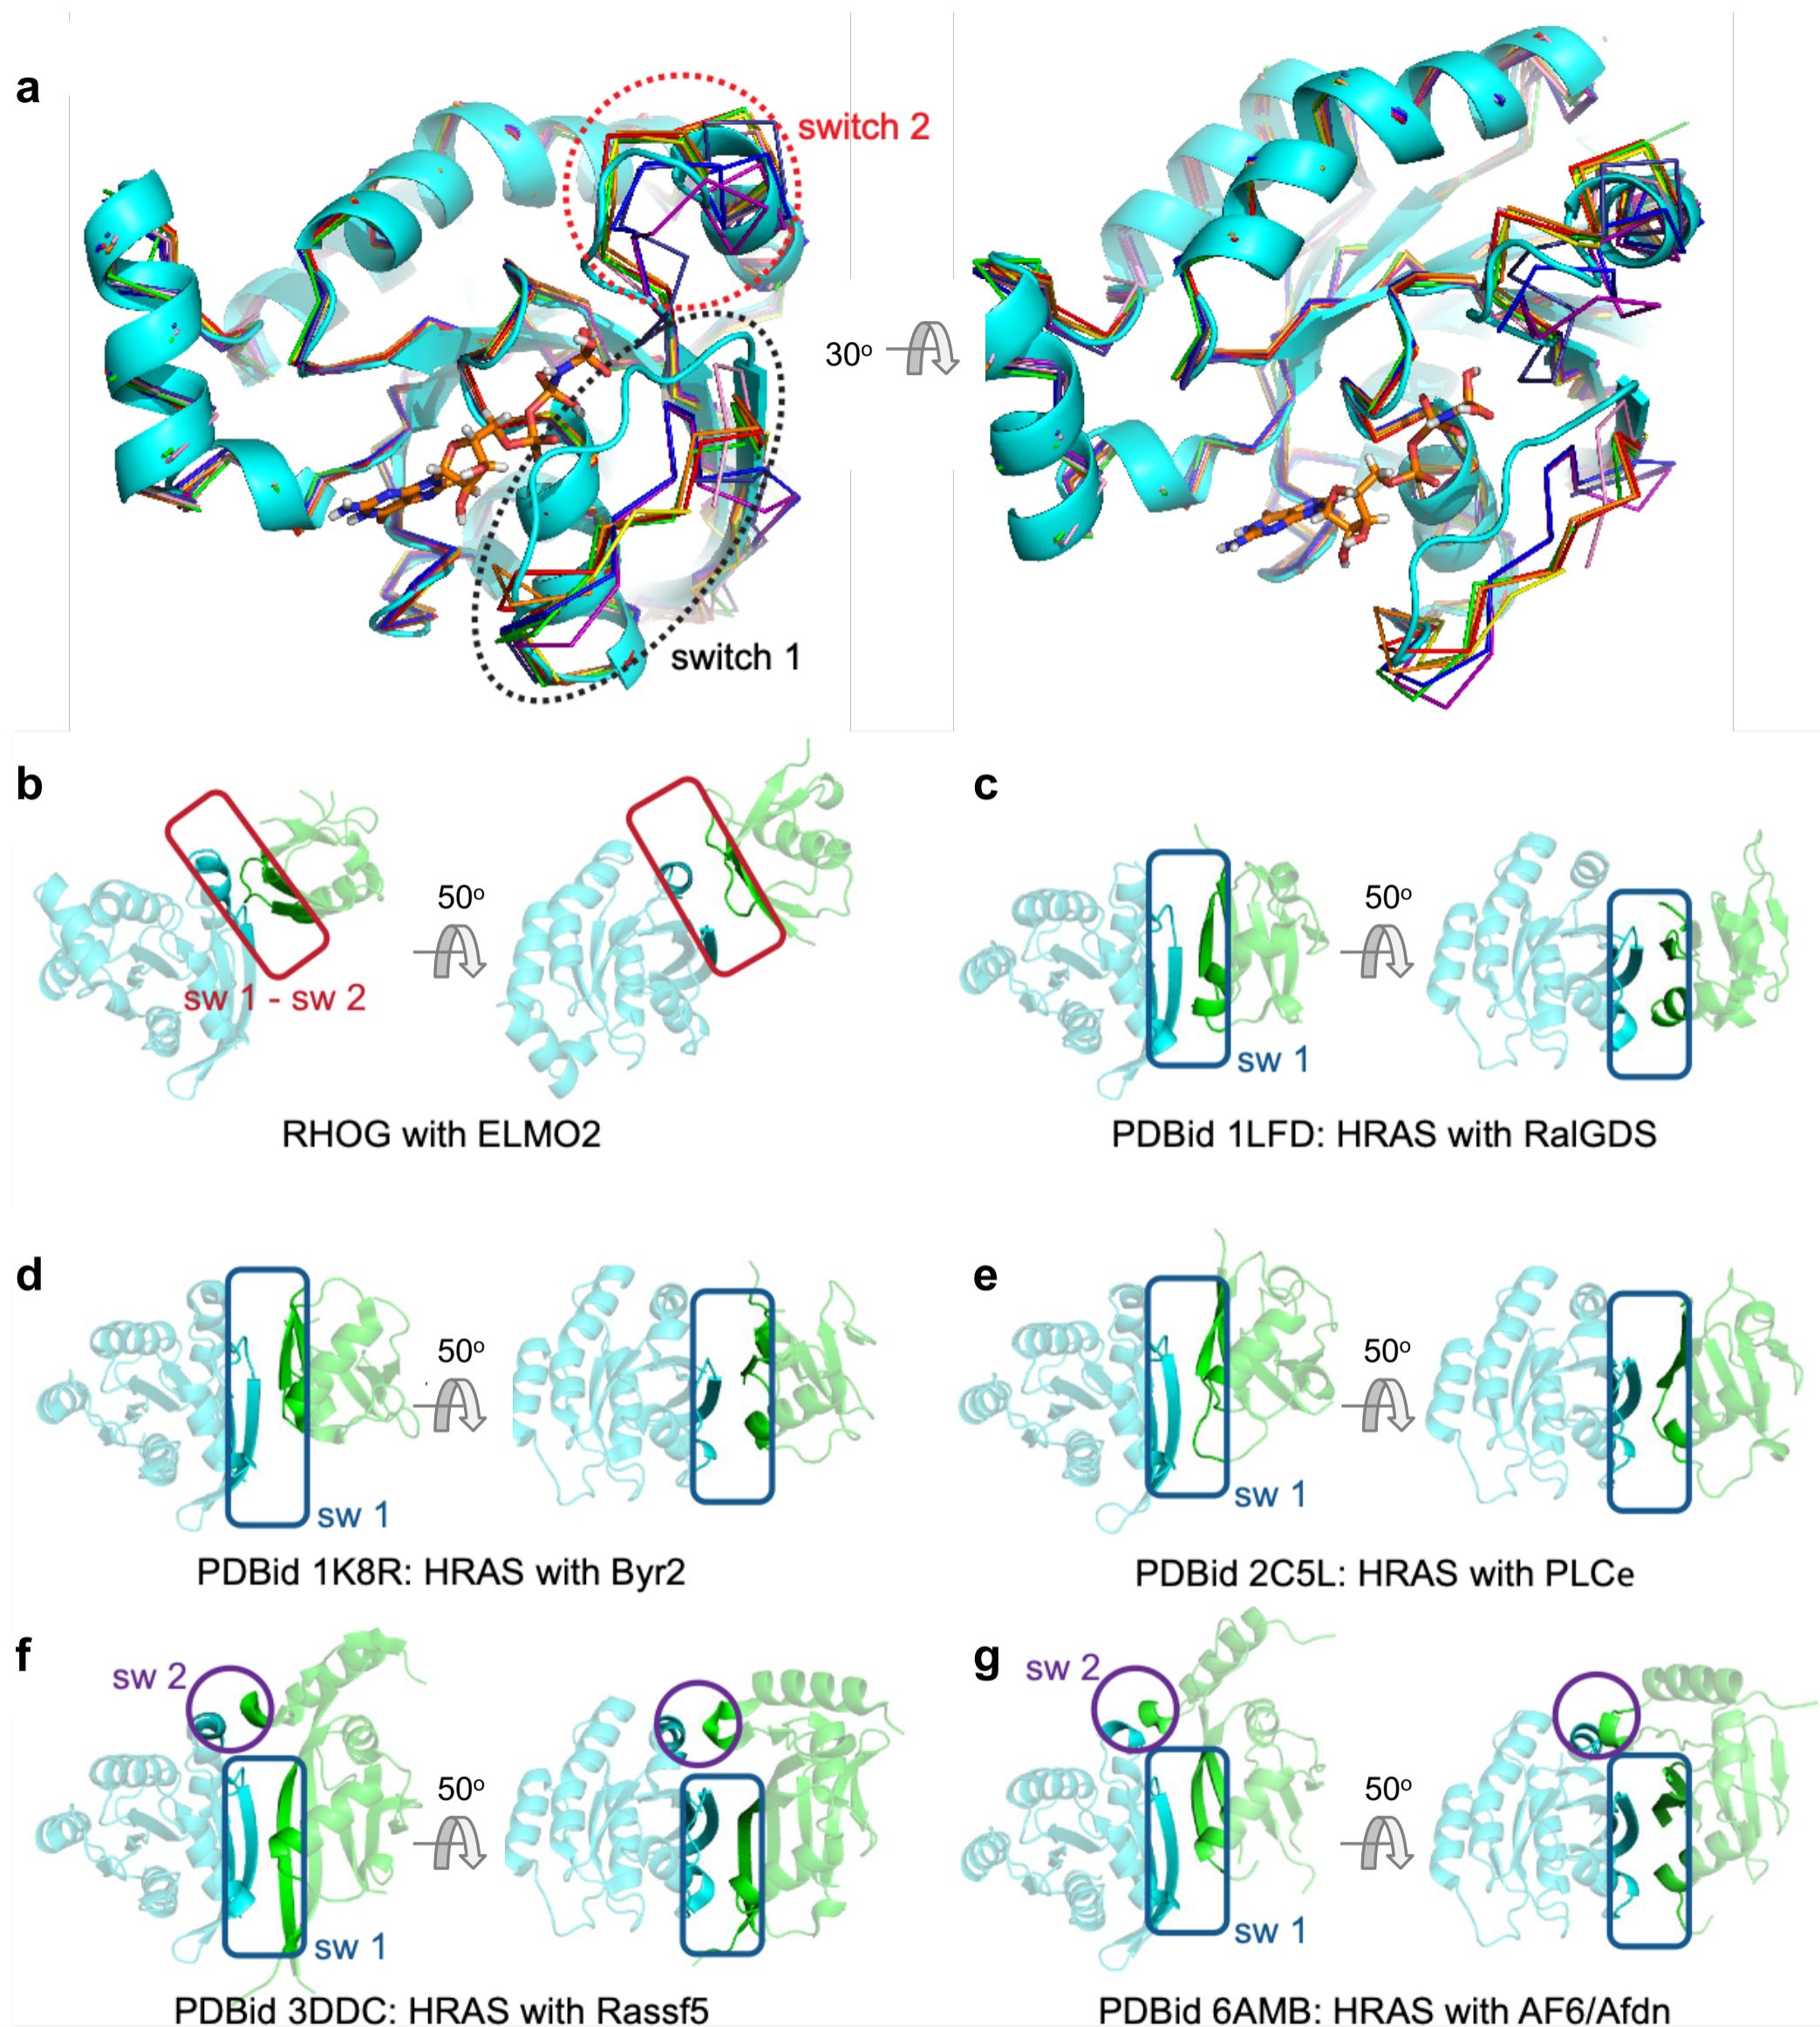

**Supplementary Figure 9 | Potential impact of a RHOG nucleotide switch and comparison of the RHOG-ELMO2 interface with available HRAS-RBD complexes.**  
**a** Structure alignment of GMPPNP-bound RHOG with other RHO family GTPases in the GDP-bound state. RHOG (cyan) is shown in cartoon and other RHO GTPases in ribbons form. These are RAC1 (PDB: 5N60, red), RAC2 (PDB: 2W2T, orange), RAC3 (PDB: 2C2H, yellow), CDC42 (PDB: 1AN0, green), RHOA (PDB: 1FTN, blue), RHOB (PDB: 2FV8, dark blue), RHOC (PDB: 2GCN, purple), and RHOU (PDB: 2Q3H, pink). The switch 1 and switch 2 regions are outlined in dotted lines. **b-g** Structure comparison of the interface between RHOG and the ELMO2 RBD versus HRAS bound to various ubiquitin-fold RBDs. All GTPases and RBDs are coloured cyan and green, respectively. Structures are depicted as ribbons and were aligned in 3D space based on position of the GTPase Intermolecular  $\beta$ -strand interactions between the RAS switch 1 region and RBDs are outlined in blue boxes, and non-canonical hydrophobic interactions with RAS switch 2 are circled in purple. The unique RHOG-ELMO2 interface which bridges switch 2 and 2 (**b**) is boxed in red; (**c**) is HRAS with RalGDS; (**d**) HRAS with Byr2; (**e**) HRAS with PLC $\epsilon$ ; (**f**) HRAS with Rassf5/Nore1; and (**g**) HRAS with AF6/Afdn.

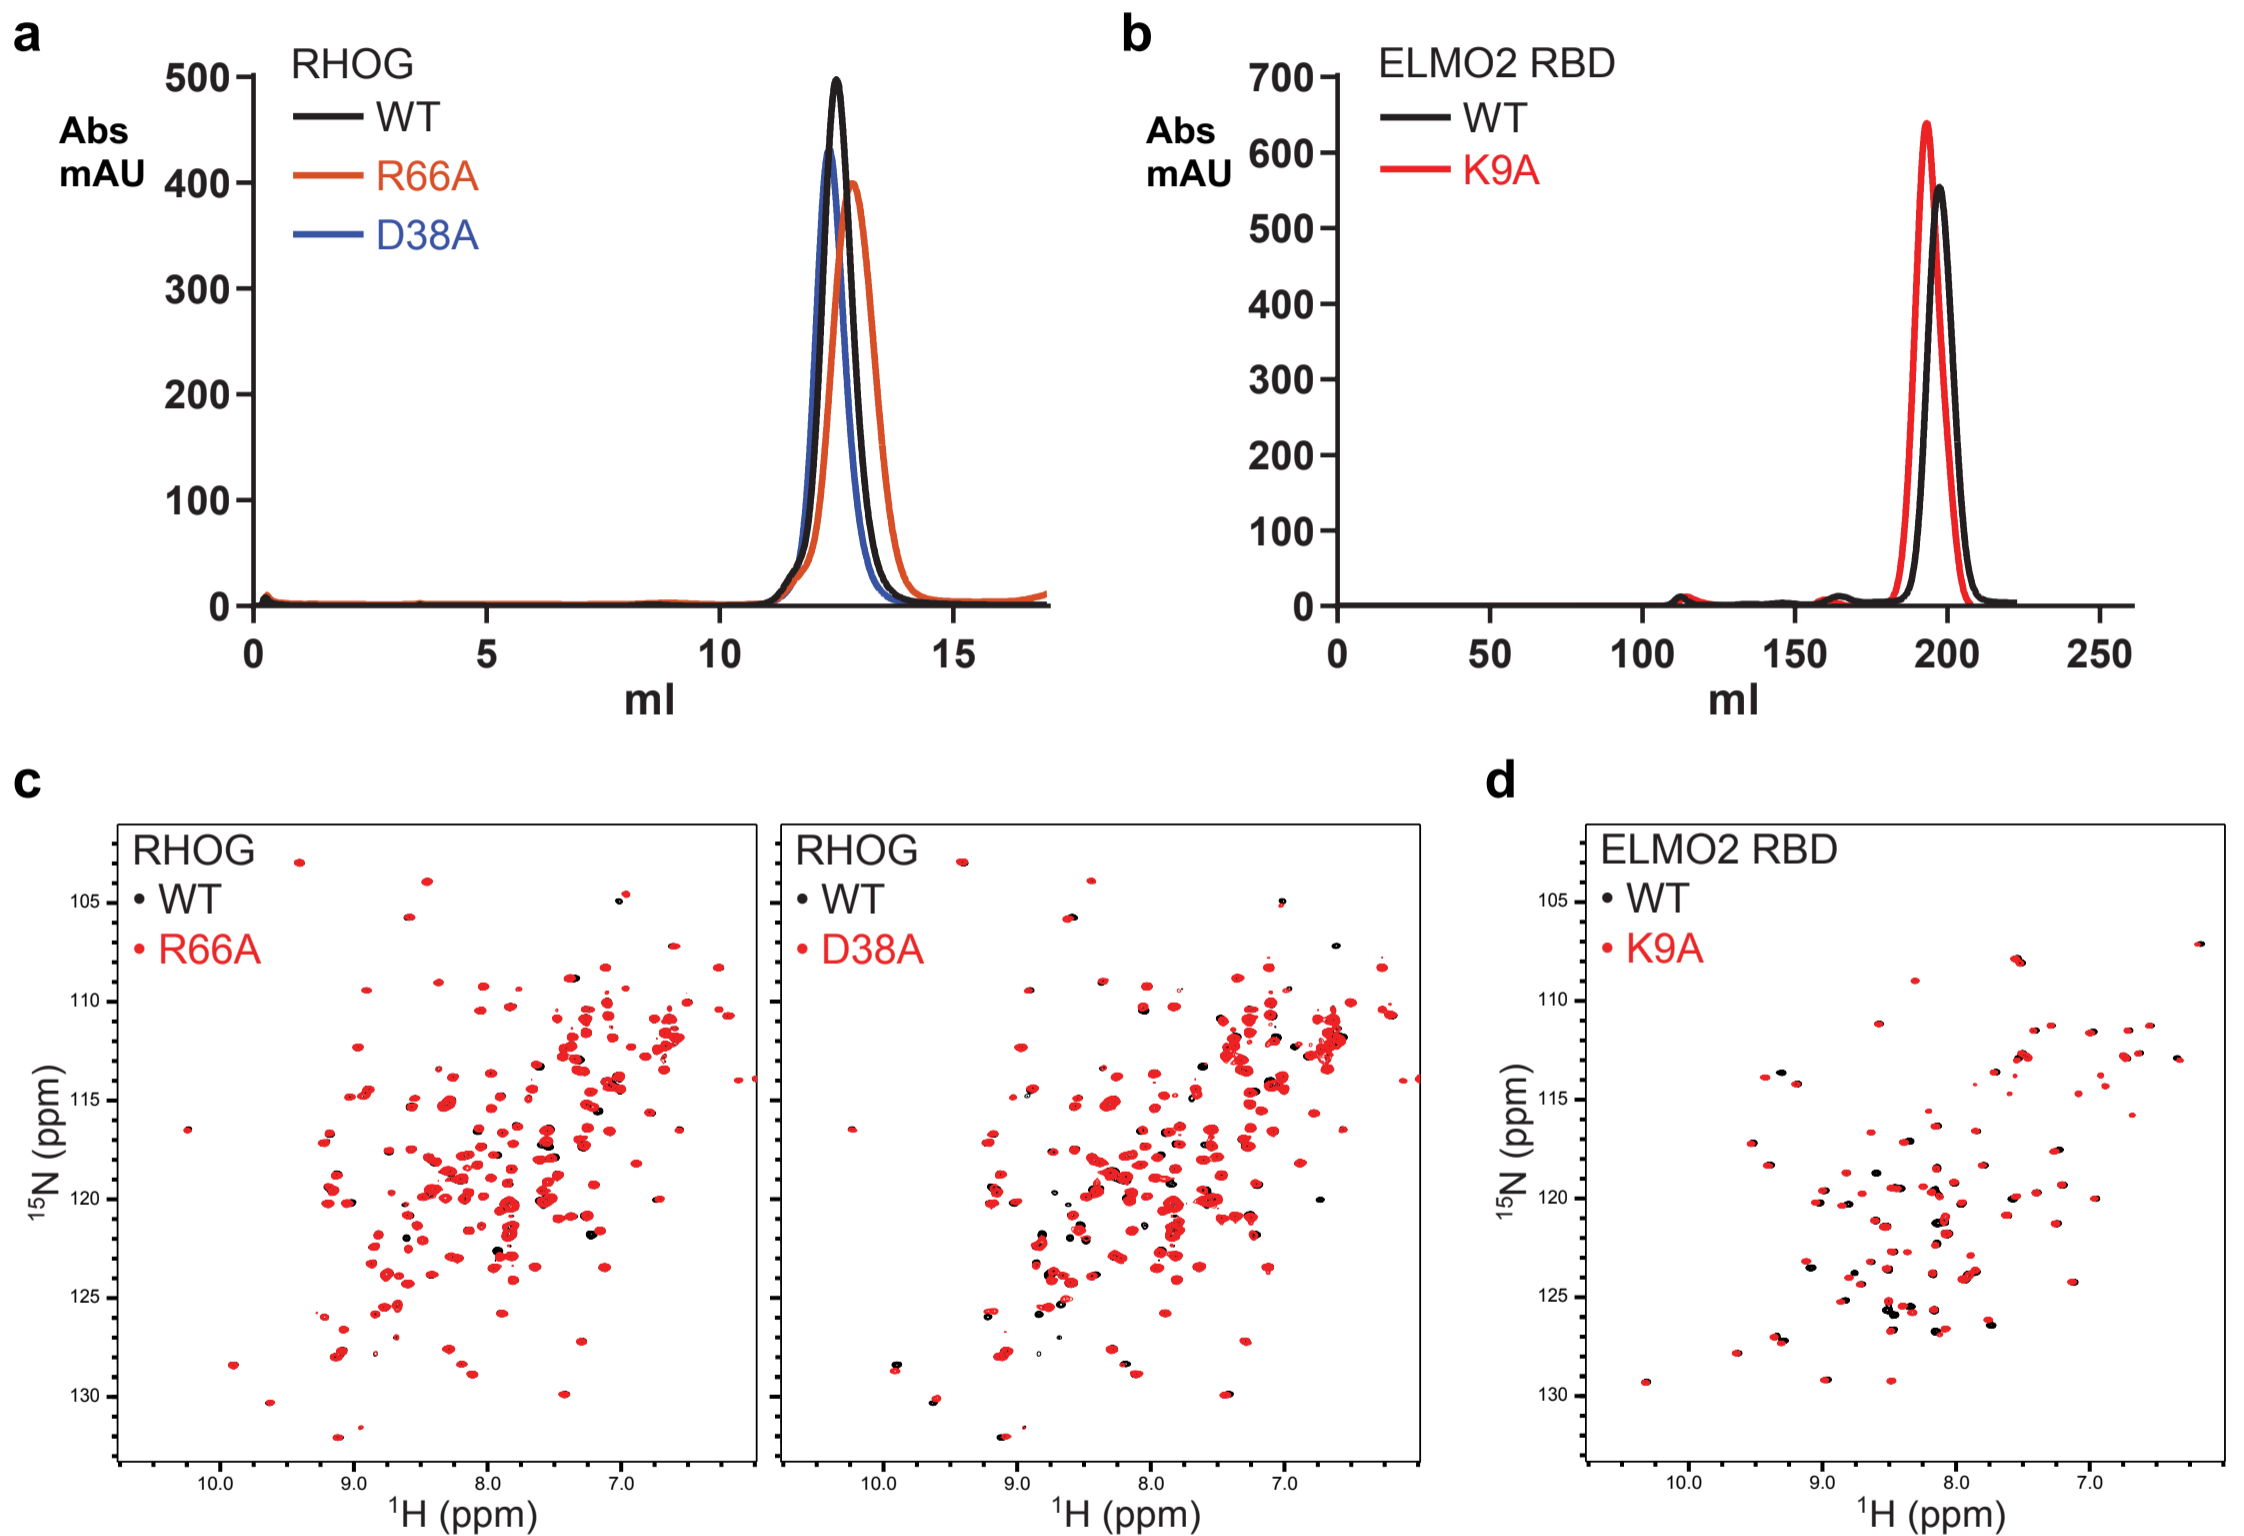

**Supplementary Figure 10 | Folding and stability of RHOG GTPase and ELMO2<sup>RBD</sup> wild-type and mutant proteins.** **a** Overlay gel filtration (Superdex 75, 10/300 GL) chromatogram profiles of R66A (red) and D38A (blue) mutants of the RHOG GTPase with the wild-type protein (black). All proteins elute as monomers. **b** Overlay gel filtration (Superdex 75, High load 20/600) chromatogram profiles of wild-type (black) and the K9A (red) mutant of ELMO2<sup>RBD</sup>. Both elute as monomers. Experiments in (a) and (b) were performed independently three times with results. **c** Overlay of <sup>1</sup>H-<sup>15</sup>N HSQC spectra of <sup>15</sup>N-labelled, GMPPNP-loaded RHOG proteins (100 μM). Chemical shifts of the R66A (left, red) and D38A (right, red) mutant proteins overlay closely with wild-type RHOG (black), confirming they are properly folded in solution. **d** Overlay of <sup>1</sup>H-<sup>15</sup>N HSQC spectra of <sup>15</sup>N-ELMO2<sup>RBD</sup> (100 μM). Chemical shifts from the K9A mutant protein (red) coincide well with the wild-type RBD (black), verifying the mutant is properly folded in solution. Experiments in (c) and (d) were performed once.

## Supplementary Table 1 | Cryo-EM data collection, refinement and validation statistics

|                                                     | DOCK2-ELMO1-RAC1 –<br>open conformation<br>(EMDB-10498)<br>(PDB 6TGC) | DOCK2-ELMO1 –<br>closed conformation<br>(EMDB-10497)<br>(PDB 6TGB) |
|-----------------------------------------------------|-----------------------------------------------------------------------|--------------------------------------------------------------------|
| <b>Data collection and processing</b>               |                                                                       |                                                                    |
| Magnification                                       | 81,000                                                                | 105,000                                                            |
| Voltage (kV)                                        | 300                                                                   | 300                                                                |
| Electron exposure (e <sup>-</sup> /Å <sup>2</sup> ) | 40                                                                    | 40                                                                 |
| Defocus range (µm)                                  | 1.5-3.2                                                               | 1.5-3.2                                                            |
| Pixel size (Å)                                      | 1.43/1.76                                                             | 1.76                                                               |
| Symmetry imposed                                    | C1                                                                    | C1                                                                 |
| Initial particle images (no.)                       | 245,763 dimers (491,526<br>protomers)                                 | 512,341 dimers<br>(1,024,682 protomers)                            |
| Final particle images (no.)                         | 417,684                                                               | 22,311                                                             |
| Map resolution (Å)                                  | 4.13                                                                  | 5.99                                                               |
| FSC threshold                                       | 0.143                                                                 | 0.143                                                              |
| Map resolution range (Å)                            | 7.80-3.90                                                             | 9.25-5.00                                                          |
| <b>Refinement</b>                                   |                                                                       |                                                                    |
| Initial model used (PDB code)                       | 3LN4C, 3A98, 2YIN, 6IDX                                               | 3LN4C, 3A98, 2YIN,<br>6IDX                                         |
| Model resolution (Å)                                | 4.1                                                                   | 5.5                                                                |
| FSC threshold                                       | 0.143                                                                 | 0.143                                                              |
| Model resolution range (Å)                          | 50-3.9                                                                | 50-5.0                                                             |
| Map sharpening <i>B</i> factor (Å <sup>2</sup> )    | -180                                                                  | -300                                                               |
| Model composition                                   |                                                                       |                                                                    |
| Non-hydrogen atoms                                  | 32,728                                                                | 18,161                                                             |
| Protein residues                                    | 5,038                                                                 | 2,342                                                              |
| Ligands                                             | 0                                                                     | 0                                                                  |
| <i>B</i> factors (Å <sup>2</sup> )                  |                                                                       |                                                                    |
| Protein                                             | X                                                                     | X                                                                  |
| Ligand                                              | -                                                                     | -                                                                  |
| R.m.s. deviations                                   |                                                                       |                                                                    |
| Bond lengths (Å)                                    | 0.01                                                                  | 0.02                                                               |
| Bond angles (°)                                     | 1.05                                                                  | 1.59                                                               |
| Validation                                          |                                                                       |                                                                    |
| MolProbity score                                    | -                                                                     | -                                                                  |
| Clashscore                                          | 95                                                                    | 95.03                                                              |
| Poor rotamers (%)                                   | 15                                                                    | 4.02                                                               |
| Ramachandran plot                                   |                                                                       |                                                                    |
| Favoured (%)                                        | 92.41                                                                 | 86.33                                                              |
| Allowed (%)                                         | 7.59                                                                  | 13.51                                                              |
| Disallowed (%)                                      | 0                                                                     | 0.16                                                               |

## Supplementary Table 2 | Cryo-EM focussed refinement parameters of domains of DOCK2-ELMO1 complexes

| Reconstruction                               | DOCK2-ELMO1-RAC1    |                                 |                      |                                               |                                                |                     |                     |                | DOCK2-ELMO1      |                  |                      |
|----------------------------------------------|---------------------|---------------------------------|----------------------|-----------------------------------------------|------------------------------------------------|---------------------|---------------------|----------------|------------------|------------------|----------------------|
|                                              | Overall             | DOCK2 <sup>DHR2</sup> -<br>RAC1 | DOCK2 <sup>ARM</sup> | DOCK2 <sup>SH3</sup> -<br>ELMO1 <sup>PH</sup> | DOCK2 <sup>DHR1</sup> -<br>DOCK2 <sup>C2</sup> | RAC1                | ELMO <sup>NTD</sup> | Whole          | Whole<br>State 1 | Whole<br>State 2 | ELMO1 <sup>NTD</sup> |
| Software                                     | RELION 2.1          |                                 |                      |                                               |                                                |                     |                     |                | RELION 2.1       |                  |                      |
| Final particles                              | 417684<br>Protomers | 394718<br>Protomers             | 462039<br>Protomers  | 421810<br>Protomers                           | 152820<br>Protomers                            | 385220<br>Protomers | 64630<br>Protomers  | 8526<br>Dimers | 22311<br>Dimers  | 6426<br>Dimers   | 154428<br>Protomers  |
| Accuracy of rotation<br>alignment (degrees)  | 1.747               | 2.800                           | 1.875                | 1.716                                         | 2.031                                          | 1.916               | 2.221               | 2.933          | 2.798            | 3.141            | 1.937                |
| Accuracy of translation<br>alignment (pixel) | 0.933               | 1.198                           | 1.008                | 0.927                                         | 1.014                                          | 0.956               | 1.159               | 1.639          | 2.001            | 2.344            | 1.336                |
| Resolution                                   | 4.13                | 3.79                            | 4.23                 | 4.15                                          | 4.60                                           | 4.06                | 6.25                | 7.80           | 9.25             | 12.34            | 5.99                 |
| B-factor for sharpening                      | -180                | -300                            | -160                 | -167                                          | -160                                           | -200                | -200                | -330           | -1203            | -1356            | -255                 |

### Supplementary Table 3 | DOCK2-ELMO1-RAC1 domains

| Subunit                         | Domain/segment      | Residues  | Coordinates      | Reference |
|---------------------------------|---------------------|-----------|------------------|-----------|
| Human DOCK2 (1,830 amino acids) |                     |           |                  |           |
|                                 | SH3-helical domains | 1-167     | PDB 3A98 (DOCK2) | 7         |
|                                 | $\alpha$ -helix     | 175-207   | <i>De novo</i>   | -         |
|                                 | C2 domain           | 219-421   | ROSETTA model    | -         |
|                                 | DHR1 domain         | 423-609   | 2                | 8         |
|                                 | ARM repeats         | 626-1194  | <i>De novo</i>   | -         |
|                                 | DHR2 domain         | 1196-1620 | PDB 2YIN (DOCK2) | 9         |
|                                 | PxxP/basic region   | 1621-1830 | Disordered       | -         |
| Human ELMO1 (727 amino acids)   |                     |           |                  |           |
|                                 | RBD-EID-ELMO        | 5-522     | PDB 6IDX (ELMO2) | 10        |
|                                 | Hinge helix         | 523-529   | <i>De novo</i>   | -         |
|                                 | PH domain           | 530-727   | PDB 3A98         | 7         |
| Human RAC1 (192 amino acids)    |                     |           |                  |           |

**Supplementary Table 4 | Crystallographic data collection and refinement statistics for ELMO2<sup>RBD</sup>-RHOG**

|                                       | ELMO2 <sup>RBD</sup> -RHOG<br>Complex<br>(PDB 6UKA) |
|---------------------------------------|-----------------------------------------------------|
| Data collection                       |                                                     |
| Space group                           | C2                                                  |
| Cell dimensions                       |                                                     |
| a, b, c (Å)                           | 100.3, 40.1, 73.9                                   |
| $\alpha$ , $\beta$ , $\gamma$ (°)     | 90, 120, 90                                         |
| Resolution (Å)                        | 27-2.40 (2.44-2.40)                                 |
| R <sub>merge</sub>                    | 0.105 (0.25)                                        |
| I / $\sigma$ I                        | 9.77 (3.95)                                         |
| Completeness (%)                      | 92.7 (85.9)                                         |
| Redundancy                            | 3.0 (2.5)                                           |
| Refinement                            |                                                     |
| Resolution (Å)                        | 27.0-2.40                                           |
| No. reflections                       | 9436                                                |
| R <sub>work</sub> / R <sub>free</sub> | 18.56/23.66                                         |
| No. atoms                             |                                                     |
| Protein                               | 1938                                                |
| Ligand/ion                            | 49                                                  |
| Water                                 | 126                                                 |
| B-factors                             |                                                     |
| Protein                               | 21.6                                                |
| Ligand/ion                            | 14.1                                                |
| Water                                 | 22.9                                                |
| R.m.s. deviations                     |                                                     |
| Bond lengths (Å)                      | 0.003                                               |
| Bond angles (°)                       | 0.64                                                |

Values in parentheses are for highest-resolution shell.

**Supplementary Table 5 | Primers used in this study**

| <b>Oligonucleotide name</b>      | <b>Oligo ref.</b> | <b>Oligonucleotide sequence</b>                                                  | <b>Purpose</b>               |
|----------------------------------|-------------------|----------------------------------------------------------------------------------|------------------------------|
| hELMO1 attB Forward              | 1                 | 5' GGGGACAAGTTTGTACAAAAAAGCA<br>GGCTTAATGCCACCACCTTCGGAC 3'                      | Gateway Cloning              |
| hELMO1 attB Reverse              | 2                 | 5' GGGGACCACTTTGTACAAGAAAGCTGGG<br>TTcaGTTACAGTCATAGACAAAGTCATAG<br>TTGCTAGGT 3' | Gateway Cloning              |
| hELMO1 delta NTD attB<br>Forward | 3                 | 5' GGGGACAAGTTTGTACAAAAAAGCAGG<br>CTTAATGTCTCGCCCGATTTTGGAAAC 3'                 | Gateway Cloning              |
| hELMO1 delta NTD attB<br>Reverse | 4                 | 5' GGGGACCACTTTGTACAAGAAAGCTGG<br>GTTcaGTTACAGTCATAGACAAAGTCATAGTTGC 3'          | Gateway Cloning              |
| Vector Forward                   | 5                 | 5' GCTCTCAGTGGCAGGCATCCCTGGGT<br>TGGATG 3'                                       | HiFi Gibson Assembly – DOCK2 |
| Vector Reverse                   | 6                 | 5' AAGGTTCCCTGAGAGAAGCTGGGACC<br>TCCACTC 3'                                      | HiFi Gibson Assembly – DOCK2 |
| Fragment 1 Forward               | 7                 | 5' ATCTGATGGAGTGGAGGTCCCAGCT<br>TCTCTCA 3'                                       | HiFi Gibson Assembly – DOCK2 |
| Fragment 1 Reverse               | 8                 | 5' CGACCCGGACTATTTGACAAATCAA<br>GTAAATT 3'                                       | HiFi Gibson Assembly – DOCK2 |
| Fragment 2 Forward               | 9                 | 5' AGGGATAAAAATTTACTTGATTTGTC<br>AAATAGTCCGG 3'                                  | HiFi Gibson Assembly – DOCK2 |
| Fragment 2 Reverse               | 10                | 5' AGAACGGTGTGAAATGCTGAAAT<br>TTCCGGTC 3'                                        | HiFi Gibson Assembly – DOCK2 |
| Fragment 3 Forward               | 11                | 5' TCATTGCAGACCGGAAATTTTCAGC<br>ATTTCAAC 3'                                      | HiFi Gibson Assembly – DOCK2 |
| Fragment 3 Reverse               | 12                | 5' GGGATAAGTGTCTCTCTAATATA<br>GGTCTACC 3'                                        | HiFi Gibson Assembly – DOCK2 |
| Fragment 4 Forward               | 13                | 5' CAGGCATGGTAGGACCTATATTAGA<br>GATGACA 3'                                       | HiFi Gibson Assembly – DOCK2 |
| Fragment 4 Reverse               | 14                | 5' GTTGGCCTCATCCAACCCAGGGAT<br>GCCTGCCA 3'                                       | HiFi Gibson Assembly – DOCK2 |
| RHOG attB Forward                | 15                | 5' GGGGACAAGTTTGTACAAAAAAGCAGGCTCCCTG<br>GTGCCGCGCGGCAGCATGCAGAGCATCAAGTGCG 3'   | Gateway Cloning              |
| RHOG attB Reverse                | 16                | 5' GGGGACCACTTTGTACAAGAAAGCTG<br>GGTCTCACAAGAGGATGCAGGACC 3'                     | Gateway Cloning              |
| RHOG D38A Top                    | 17                | 5' CCACCGTGTTGCGCAATTACAGCGC 3'                                                  | Mutagenesis                  |



|                   |    |                                                                            |                               |
|-------------------|----|----------------------------------------------------------------------------|-------------------------------|
| RHOG D38A Bottom  | 18 | 5' GCGCTGTAATTGGCGAACACGGTGG 3'                                            | Mutagenesis                   |
| RHOG R66A Top     | 19 | 5' CAGGAGGAGTATGACGCCCTCCGTACACTCTC 3'                                     | Mutagenesis                   |
| RHOG R66A Bottom  | 20 | 5' GAGAGTGTACGGAGGGCGTCATACTCCTCCTG 3'                                     | Mutagenesis                   |
| hELMO2 K9A Top    | 21 | 5' CGTCTGACATTGTGCGCAGTGGCCATCGAG 3'                                       | Mutagenesis                   |
| hELMO2 K9A Bottom | 22 | 5' CTCGATGGCCACTGCGACAATGTCAGACG 3'                                        | Mutagenesis                   |
| pos6R             | 23 | 5' ATTTCCGUGTCGCCCTTATTC3'                                                 | DOCK2DHR2 avi tag pOPIN*      |
| pos7F             | 24 | 5'ACGGAAAUGTTGAATACTCATACTCTTC3'                                           | DOCK2DHR2 avi tag pOPIN*      |
| DOCK2aviR         | 25 | 5' ATGCCACUCGATTTTTTGGAGCTTCAAAAATATCATTAAAGACCCTG<br>GTAGTACAGGTTTTTCGG3' | DOCK2DHR2 avi tag pOPIN*      |
| DOCK2aviF         | 26 | 5' AGTGGCAUGAGGGTTCTGCTGGTGAATGCGGAGATATG<br>ACAGATG3'                     | DOCK2DHR2 avi tag pOPIN*      |
| Ppr(r1)           | 27 | 5' ATATTTATAGGUTTTTTTATTACAAAACCTGTTAC3'                                   | ELMO1ΔNTD                     |
| elmoNdelF         | 28 | 5' ACCTATAAATAUGTCTCGCCCGATTTTGGAAC3'                                      | ELMO1ΔNTD                     |
| elmoaviR          | 29 | 5' ATCTTCTGUGCTTCAAAAATATCATTAAAGACCAGCACCCTG<br>TTACAGTCATAG3'            | ELMO1ΔNTD                     |
| elmoaviF          | 30 | 5' ACAGAAGAUTGAATGGCATGAAGAGAATTTGTAT<br>TTTCAAAGTTGGAG 3'                 | ELMO1Δ NTD                    |
| Dk2DDR            | 31 | 5' ATAGCGTTCUGGCTGAGCAGCTCAGCGTCAAAGATCTCCATCT                             | DOCK2<br>Y1315A/L1322A/Y1329A |
| Dk2DDF            | 32 | 5' AGAACGCTAUCCAGCAGGCAAATTCGCTGAAA<br>GCATCATGAAAATC                      | DOCK2<br>Y1315A/L1322A/Y1329A |
| Ubr               | 33 | 5' AGCATGCGGUCTACGGGTACGTTTAAACCAGA                                        | DOCK2<br>Y1315A/L1322A/Y1329A |
| <u>1Fubase</u>    | 34 | 5' ACCGCATGCUTGGCTATGGCAGGGCTTGC                                           | DOCK2<br>Y1315A/L1322A/Y1329A |
| Ppr(r1)           | 35 | 5' ATATTTATAGGUTTTTTTATTACAAAACCTGTTAC                                     | DOCK2 cloning                 |
| Dk2fIF            | 36 | 5' ACCTATAAATAUGGGTAGCAGATATACCATGA                                        | DOCK2 cloning                 |
| UCDMF             | 37 | 5' ACAAGCT <sub>u</sub> GTCGAGA AGTACTAG                                   | DOCK2 cloning                 |
| Ppr(r1)           | 38 | 5' ATATTTATAGG <sub>u</sub> TTTTTTAT TACAAAACCTG TTAC                      | DOCK2 cloning                 |
| Dk2fIF            | 39 | 5' ACCTATAAATA <sub>u</sub> g GGTAGC AGATATACCA TGA                        | DOCK2 cloning                 |

|          |    |                                             |               |
|----------|----|---------------------------------------------|---------------|
| D2fIR2   | 40 | 5' ATGGCTGuCA TACATGCCAC AAA                | DOCK2 cloning |
| D2fIF2   | 41 | 5' ACAGCCAu CTTAAACCAGATGG                  | DOCK2 cloning |
| Dk2fIR   | 42 | 5' AAGCTTGu ta GTGAt GGTGATGGTG ATGAT       | DOCK2 cloning |
| TevelmoF | 43 | 5' AGTGGTGcu GAGAATTTGTATTTTCAAAG TTGGAGC   | ELMO1 cloning |
| Ppr(r1)  | 44 | 5' ATATTTATAGGu TTTTTTAT TACAAAAGT TTAC     | ELMO1 cloning |
| elmoF    | 45 | 5' AC CTATAAATaug CCaC CaCCTTCGGACATCGTGAAG | ELMO1 cloning |
| ElmoR    | 46 | 5' AGCACCACuG TTACAGTCAT AGACAAAGTC ATAG    | ELMO1 cloning |

## Supplementary References

- 1 Fernandez-Leiro, R. & Scheres, S. H. W. A pipeline approach to single-particle processing in RELION. *Acta crystallographica. Section D, Structural biology* **73**, 496-502, (2017).
- 2 Nakane, T., Kimanius, D., Lindahl, E. & Scheres, S. H. Characterisation of molecular motions in cryo-EM single-particle data by multi-body refinement in RELION. *eLife* **7**, doi:10.7554/eLife.36861 (2018).
- 3 Scheres, S. H. RELION: implementation of a Bayesian approach to cryo-EM structure determination. *J Struct Biol* **180**, 519-530, (2012).
- 4 Scheres, S. H. Semi-automated selection of cryo-EM particles in RELION-1.3. *Journal of structural biology* **189**, 114-122, (2015).
- 5 Bai, X. C., Rajendra, E., Yang, G., Shi, Y. & Scheres, S. H. Sampling the conformational space of the catalytic subunit of human gamma-secretase. *eLife* **4**, doi:10.7554/eLife.11182 (2015).
- 6 Yang, Z. *et al.* UCSF Chimera, MODELLER, and IMP: an integrated modeling system. *J Struct Biol* **179**, 269-278, (2012).
- 7 Hanawa-Suetsugu, K. *et al.* Structural basis for mutual relief of the Rac guanine nucleotide exchange factor DOCK2 and its partner ELMO1 from their autoinhibited forms. *Proceedings of the National Academy of Sciences of the United States of America* **109**, 3305-3310, (2012).
- 8 Premkumar, L. *et al.* Structural basis of membrane targeting by the Dock180 family of Rho family guanine exchange factors (Rho-GEFs). *The Journal of biological chemistry* **285**, 13211-13222, (2010).
- 9 Kulkarni, K., Yang, J., Zhang, Z. & Barford, D. Multiple Factors Confer Specific Cdc42 and Rac Protein Activation by Dedicator of Cytokinesis (DOCK) Nucleotide Exchange Factors. *The Journal of biological chemistry* **286**, 25341-25351, (2011).
- 10 Weng, Z. *et al.* Structure of BAI1/ELMO2 complex reveals an action mechanism of adhesion GPCRs via ELMO family scaffolds. *Nature communications* **10**, 51, doi:10.1038/s41467-018-07938-9 (2019).
