# Supplementary material for: Structure of the DOCK2−ELMO1 complex provides insights into regulation of the auto-inhibited state
Source: PubMed Central journal article supplement (PMC7351999; doi:10.1038/s41467-020-17271-9), 2020-07-10
Supplement: 41467_2020_17271_MOESM3_ESM.pdf [file 41467_2020_17271_MOESM3_ESM.pdf]

## **Description of Additional Supplementary Files**

File Name: Supplementary Movie 1

Description: Conformational change of ELMO1. Movie showing morphing between the open- and closed- (auto-inhibited) conformations of the DOCK2–ELMO1 complex. EM density for the open-conformation is in light blue and yellow for the closed-conformation.

File Name: Supplementary Movie 2

Description: ELMO-NTD is required for cell motility. Comparison of phase contrast bright-field live-cell imaging videos of HeLa cells expressing the indicated plasmids imaged using time-lapse microscopy for 6 h.
